# Supplementary material for: Structural modulation of gut microbiota in life-long calorie-restricted mice
Source: Springer Nature journal article supplement (doi:10.1038/ncomms3163), 2013-07-16
Supplement: 41467_2013_BFncomms3163_MOESM533_ESM.pdf [file 41467_2013_BFncomms3163_MOESM533_ESM.pdf]

# Supplementary Information

## Supplementary Figures

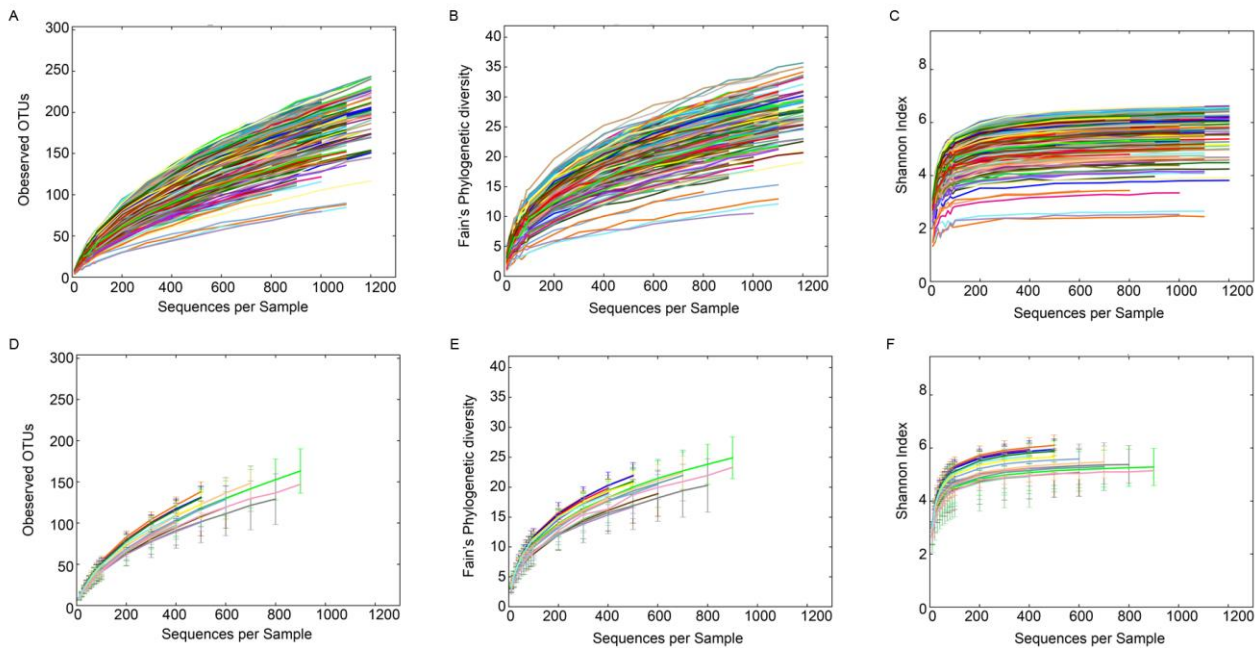

**Supplementary Figure S1. Diversity of the gut microbiota.** (A) Rarefaction analysis of sampling by observed OTU method. (B) Rarefaction analysis of sampling by PD whole tree method. (C) Shannon Diversity Index curves to estimate the diversity of taxa present in individual animals. (D) Rarefaction analysis of 6 groups by observed OTU method. (E) Rarefaction analysis of 6 groups by PD whole tree method. (F) Shannon Diversity Index curves to estimate the diversity of taxa present in 6 groups. Data in D, E and F are shown as mean  $\pm$  s.d.. For 62 weeks, LFD, n=21; LFD+CR, n=29; LFD+Ex, n=22; HFD, n=28; HFD+CR, n=29; and HFD+Ex, n=23. For 83 weeks, LFD, n=16; LFD+CR, n=22; LFD+Ex, n=19; HFD, n=12; HFD+CR, n=14; and HFD+Ex, n=15. For 141 weeks, LFD, n=6; LFD+CR, n=15; LFD+Ex, n=6; HFD, n=0; HFD+CR, n=10; and HFD+Ex, n=1.

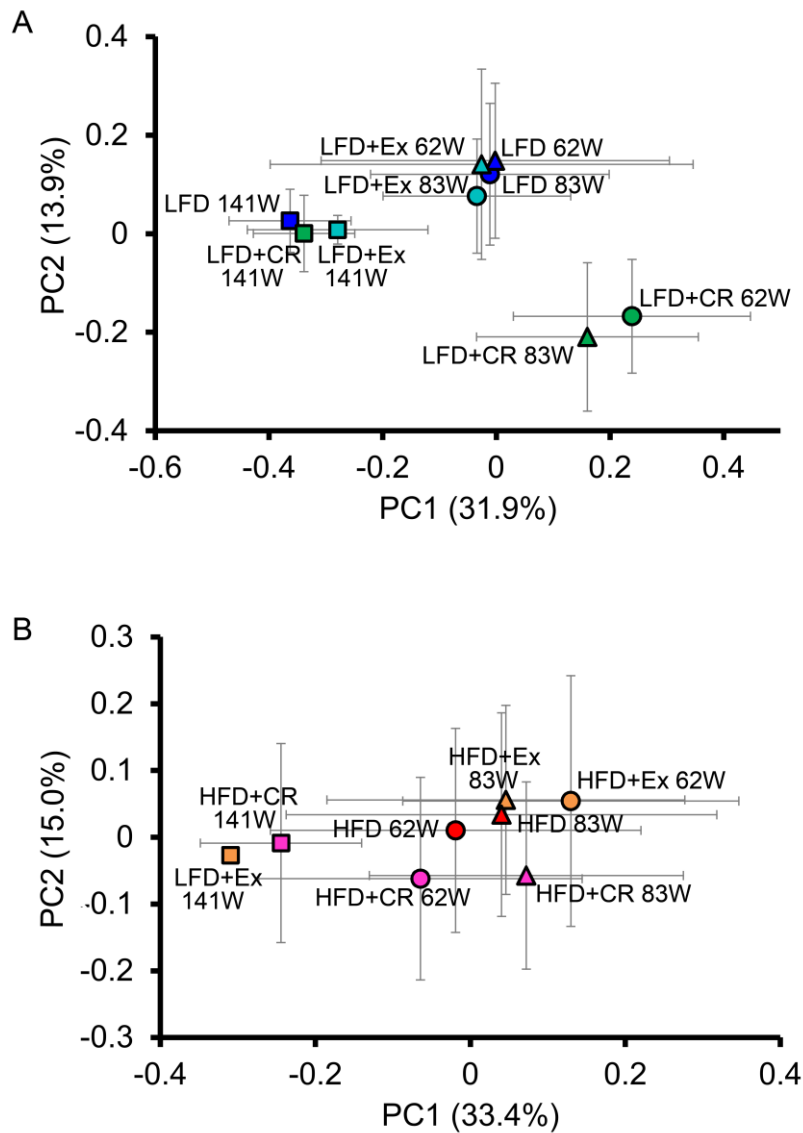

**Supplementary Figure S2** Trajectory analysis of the gut microbiota. (A) normal chow and (B) high fat diet. Weighted UniFrac PCoA of the gut microbiota between different treatment groups at 62, 83 and 141 weeks based on pyrosequencing OTU (97% identity) data. Each point represents the mean principal coordinate (PC) score from all of the mice in a group at one time point, and the error bar represents the s.d. Sample size was the same as Supplementary Figure S1.

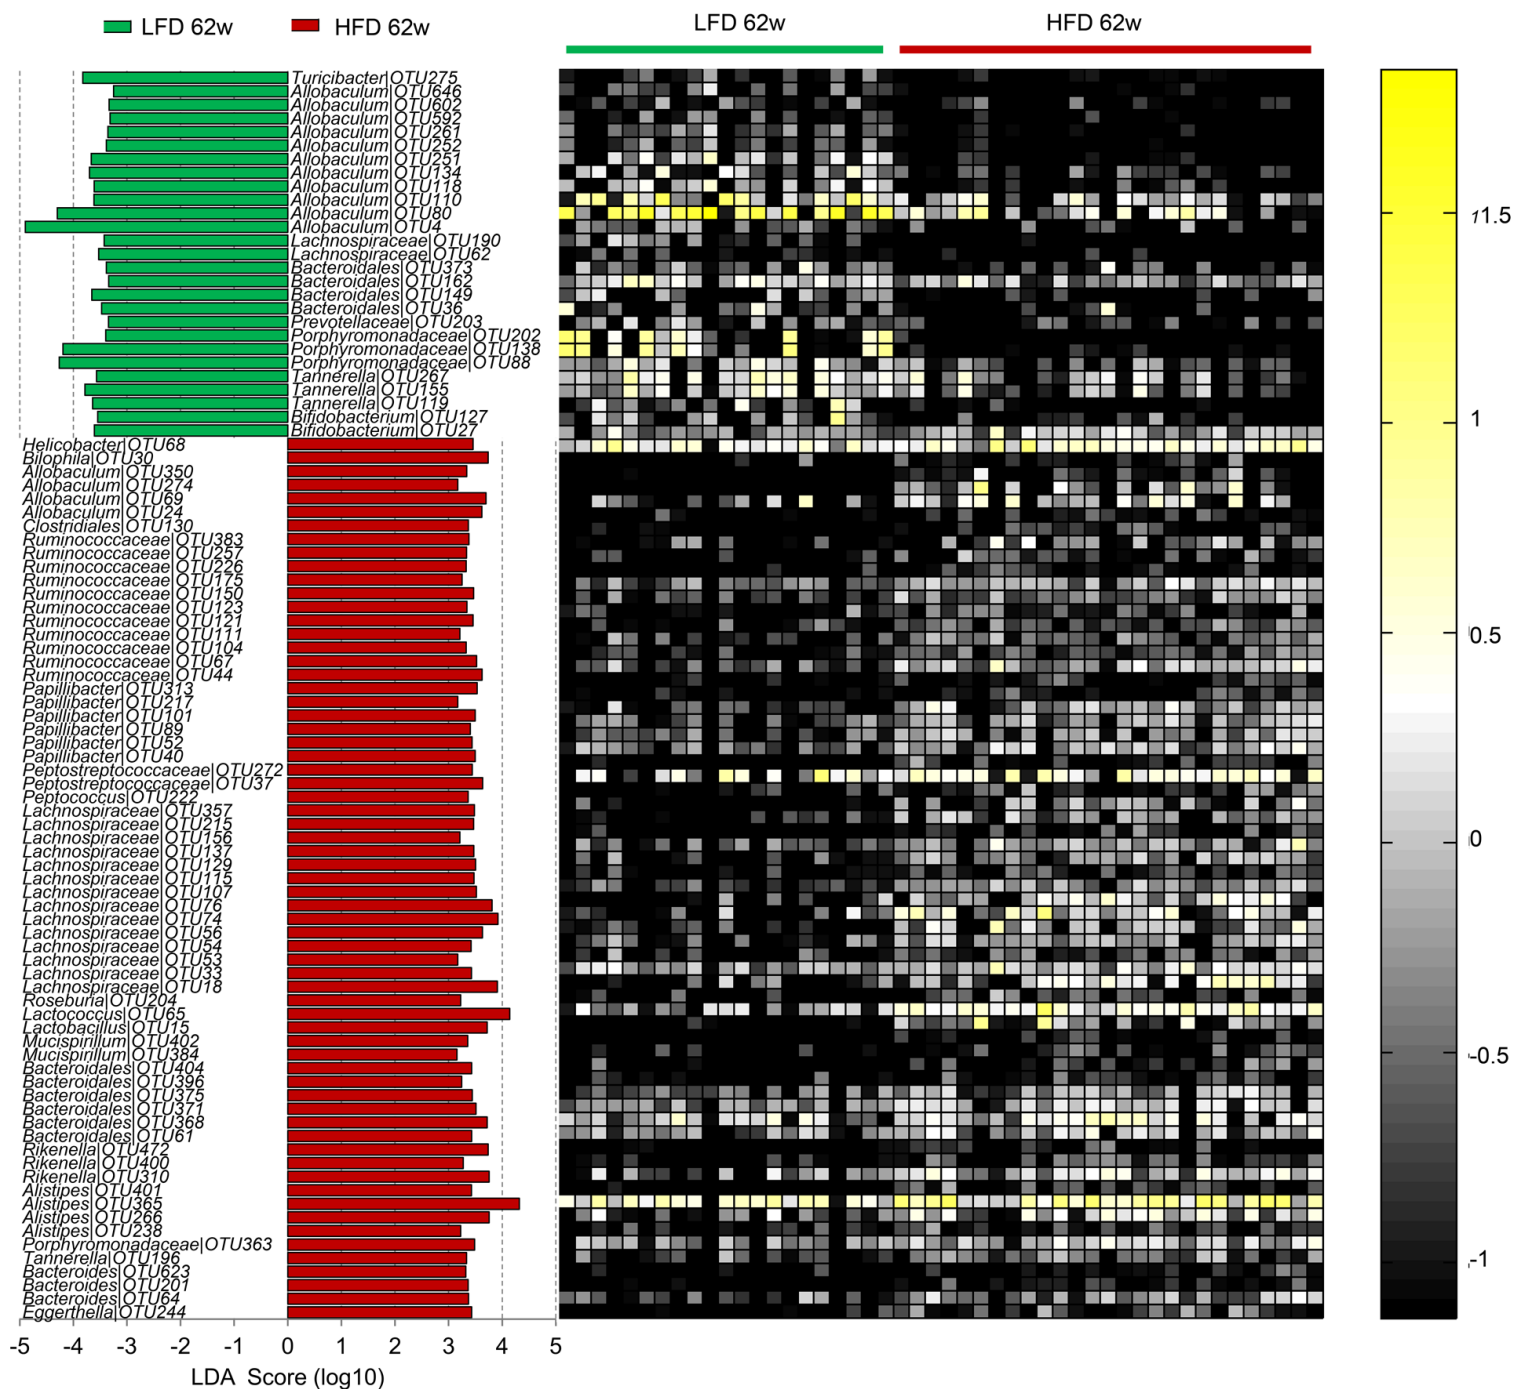

**Supplementary Figure S3. The key phylotypes of the gut microbiota responding to high-fat diet identified by LEfSE.** LFD (n=21) vs. HFD (n=28) at 62 weeks. The left histogram shows the LDA scores computed for features (on OTU level) differentially abundant between the *ab libitum* and CR mice. The right heat-map shows the relative abundance (log10 transformation) of OTUs.

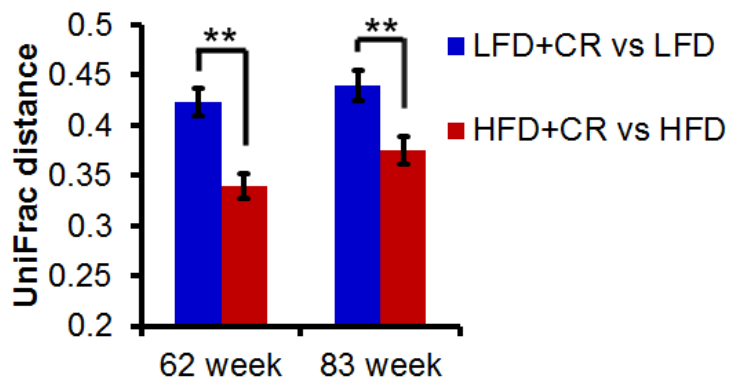

**Supplementary Figure S4. The variation of the gut microbiota induced by restriction of normal chow was larger than the variation of the gut microbiota induced by restriction of a high-fat diet.** The distance between two samples (one from the *ad libitum* group and the other from the CR group) was calculated using the UniFrac distance and is shown as the mean  $\pm$  SEM. \*\* $P < 0.01$  by one-way ANOVA. For 62 weeks, LFD,  $n=21$ ; LFD+CR,  $n=29$ ; HFD,  $n=28$ ; HFD+CR,  $n=29$ . For 83 weeks, LFD,  $n=16$ ; LFD+CR,  $n=22$ ; HFD,  $n=12$ ; HFD+CR,  $n=14$ .

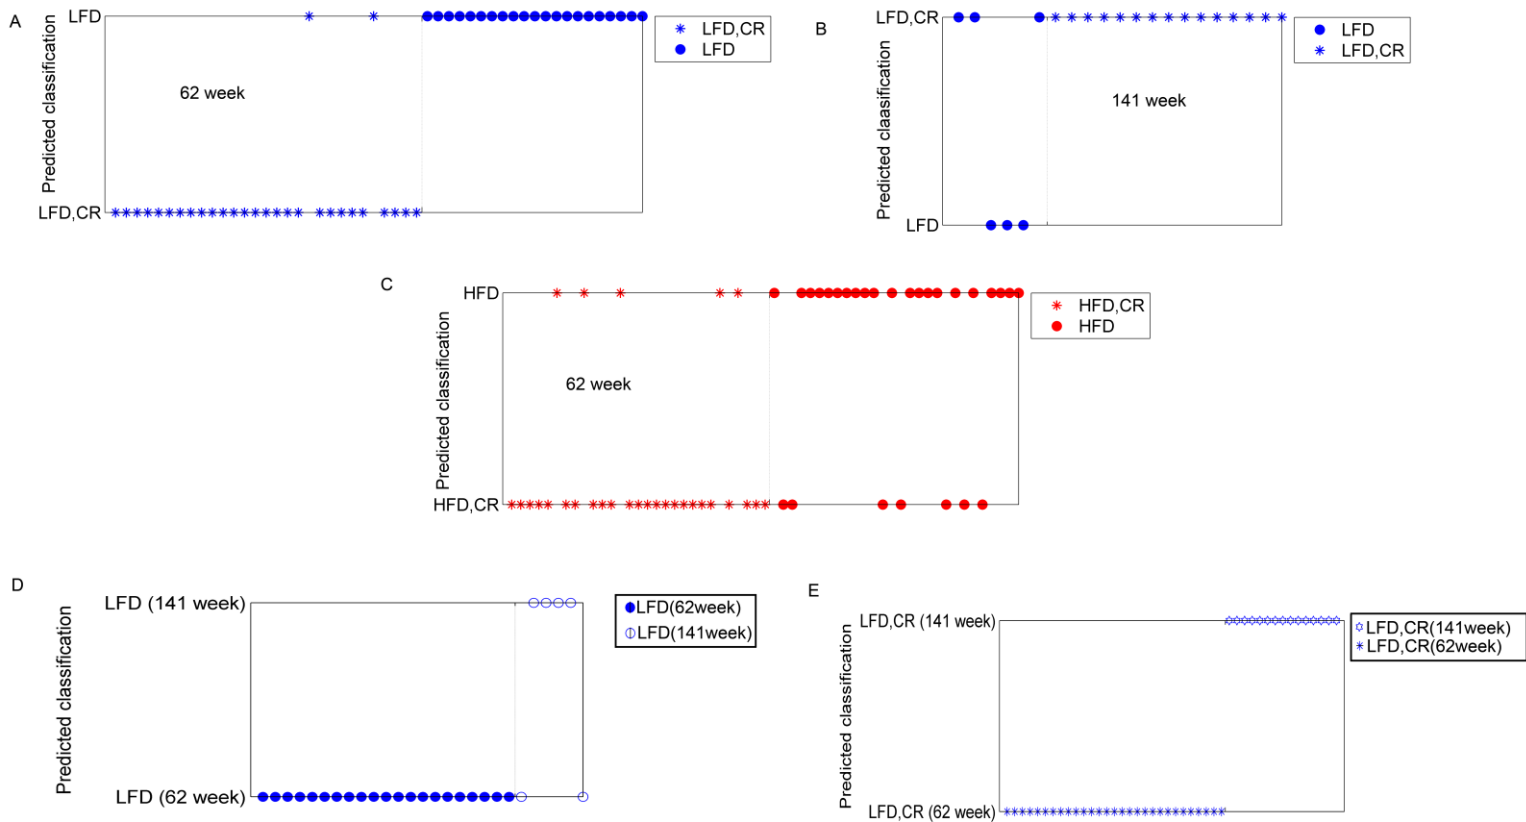

**Supplementary Figure S5. PLS-DA model plots.** (A) Plot based on the first two components of the gut microbiota data in LFD+CR and LFD at 62 weeks (LFD, n=21; LFD+CR, n=29). The correct classification rate of this PLD model is 96% by Leave-one-out cross validation. (B) Plot based on the first component of the gut microbiota data in LFD+CR and LFD at 141 weeks (LFD, n=6; LFD+CR, n=15). The correct classification rate of this PLD model is 85.7% by Leave-one-out cross validation. (C) Plot based on the first two components of the gut microbiota data in HFD+CR and HFD at 62 weeks (HFD, n=28; HFD+CR, n=29). The correct classification rate of this PLD model is 78.9% by Leave-one-out cross validation. (D) Plot based on the first two components of the gut microbiota data in LFD from between 62 weeks (n=21) and 141 weeks (n=6). The correct classification rate of this PLD model is 92.6% by Leave-one-out cross validation. (E) Plot based on the first two components of the gut microbiota data in LFD+CR from between 62 weeks (n=29) and 141 weeks (n=15). The correct classification rate of this PLD model is 100% by Leave-one-out cross validation.

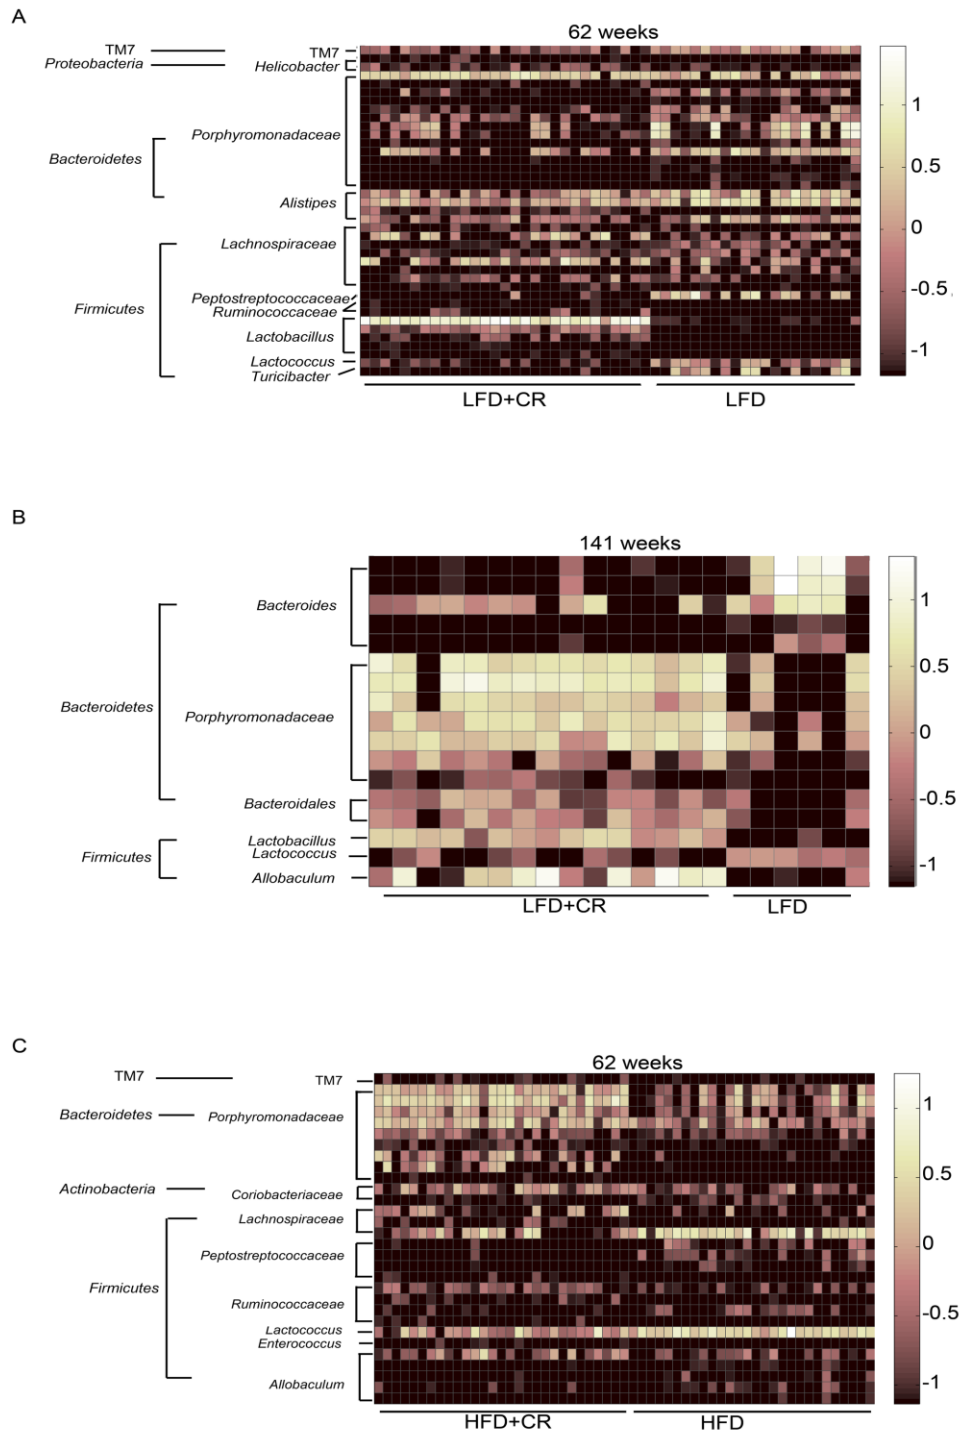

**Supplementary Figure S6. Abundance distribution of the key phylotypes of gut microbiota responding to life-long CR based on PLS-DA. (A) LFD vs. LFD+CR at 62 weeks. (B) LFD vs. LFD+CR at 141 weeks. (C) HFD vs. HFD+CR at 62 weeks. The relative abundance of each OTU was shown after log transformation. The taxa of the OTUs were shown on the left of heat map. Sample size was the same as Supplementary Figure S5.**

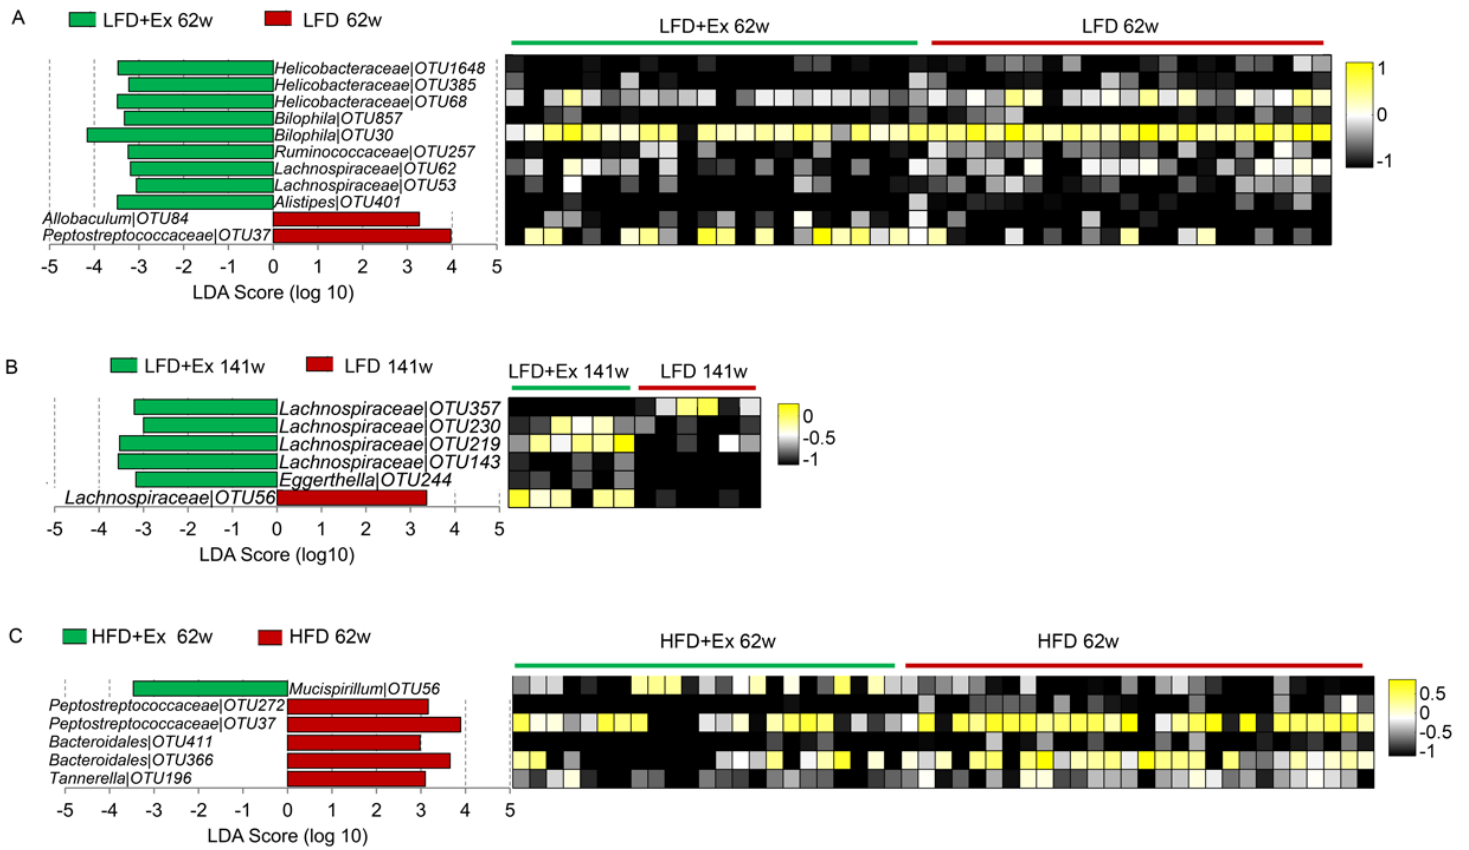

**Supplementary Figure S7 The key phylotypes of the gut microbiota responding to exercise identified by LEfSE.** (A) LFD (n=21) vs. LFD+Ex (n=22) at 62 weeks. (B) LFD (n=6) vs. LFD+Ex (n=6) at 141 weeks. (C) HFD (n=28) vs. HFD+Ex (n=23) at 62 weeks. The left histogram shows the LDA scores computed for features (on OTU level) differentially abundant between the ab libitum and CR mice. The right heat-map shows the relative abundance (log<sub>10</sub> transformation) of OTUs.

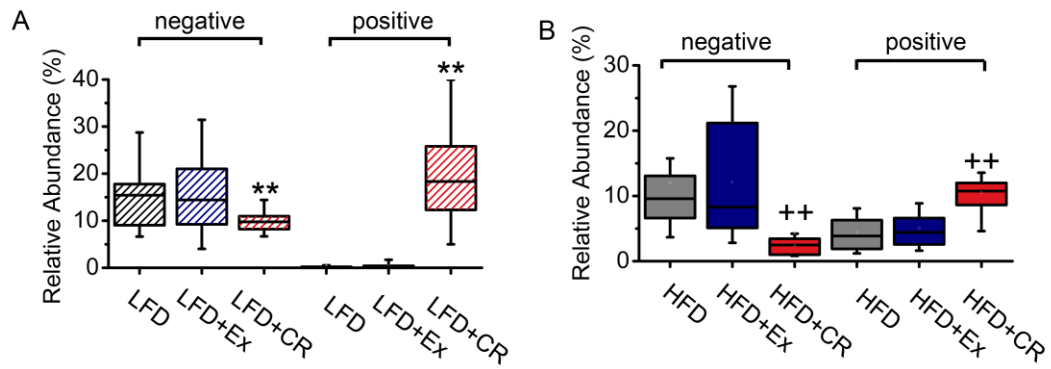

**Supplementary Figure S8. Gut microbiota-associated antigen load changes.**

Relative abundance of the phylotypes negative and positive correlated with lifespan of mice on (A) normal chow (LFD n=16, LFD+CR n=22 and LFD+Ex n=19) and (B) high fat diet (HFD n=12, HFD+CR n=14 and HFD+Ex n=15) at 83 weeks. \*P < 0.05 and \*\*P<0.01 vs. LFD, +P < 0.05 and ++P<0.01 by ANOVAs.



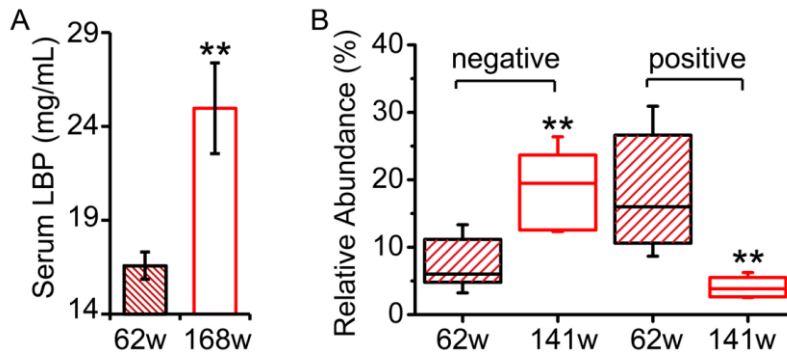

**Supplementary Figure S9. Gut microbiota-associated antigen load changes. (A)**

The serum level of LBP of LFD+CR mice at 62 (n=8) and 141 (n=5) weeks. (B)

Relative abundance of the phylotypes negative and positive correlated with lifespan of

LFD+CR mice at 62 (n=22) and 141 (n=12) weeks. \*\*P<0.01 vs. 62 weeks by

ANOVA.

## Supplementary Tables

**Supplementary Table S1. The phylotypes of gut microbiota differentially abundant between the LFD and LFD+ CR mice at 62 weeks using LEfSe.**

| OTU id | Taxon                 |                              |                           |                                   |                                           | Riched group | LDA Score (log10) | p value   |
|--------|-----------------------|------------------------------|---------------------------|-----------------------------------|-------------------------------------------|--------------|-------------------|-----------|
|        | Phylum                | Class                        | Order                     | Family                            | Genus                                     |              |                   |           |
| 138    | <i>Bacteroidetes</i>  | <i>Bacteroidia</i>           | <i>Bacteroidales</i>      | <i>Porphyromonadaceae</i>         | <i>unclassified_Porphyromonadacea</i>     | LFD          | 4.144615785       | 0.0320901 |
| 88     | <i>Bacteroidetes</i>  | <i>Bacteroidia</i>           | <i>Bacteroidales</i>      | <i>Porphyromonadaceae</i>         | <i>unclassified_Porphyromonadacea</i>     | LFD          | 4.205998027       | 0.0156271 |
| 203    | <i>Bacteroidetes</i>  | <i>Bacteroidia</i>           | <i>Bacteroidales</i>      | <i>Prevotellaceae</i>             | <i>unclassified_Prevotellaceae</i>        | LFD          | 3.487361873       | 0.0061756 |
| 197    | <i>Bacteroidetes</i>  | <i>Bacteroidia</i>           | <i>Bacteroidales</i>      | <i>Rikenellaceae</i>              | <i>Alistipes</i>                          | LFD          | 3.992423507       | 0.0050575 |
| 365    | <i>Bacteroidetes</i>  | <i>Bacteroidia</i>           | <i>Bacteroidales</i>      | <i>Rikenellaceae</i>              | <i>Alistipes</i>                          | LFD          | 4.04667192        | 0.0020967 |
| 162    | <i>Bacteroidetes</i>  | <i>Bacteroidia</i>           | <i>Bacteroidales</i>      | <i>unclassified_Bacteroidales</i> | <i>unclassified_Bacteroidales</i>         | LFD          | 3.386314821       | 5.05E-05  |
| 36     | <i>Bacteroidetes</i>  | <i>Bacteroidia</i>           | <i>Bacteroidales</i>      | <i>unclassified_Bacteroidales</i> | <i>unclassified_Bacteroidales</i>         | LFD          | 3.36646927        | 0.0426008 |
| 366    | <i>Bacteroidetes</i>  | <i>Bacteroidia</i>           | <i>Bacteroidales</i>      | <i>unclassified_Bacteroidales</i> | <i>unclassified_Bacteroidales</i>         | LFD          | 3.863822126       | 4.60E-05  |
| 368    | <i>Bacteroidetes</i>  | <i>Bacteroidia</i>           | <i>Bacteroidales</i>      | <i>unclassified_Bacteroidales</i> | <i>unclassified_Bacteroidales</i>         | LFD          | 3.589722551       | 0.021847  |
| 61     | <i>Bacteroidetes</i>  | <i>Bacteroidia</i>           | <i>Bacteroidales</i>      | <i>unclassified_Bacteroidales</i> | <i>unclassified_Bacteroidales</i>         | LFD          | 3.221283311       | 0.0320297 |
| 65     | <i>Firmicutes</i>     | <i>Bacilli</i>               | <i>Lactobacillales</i>    | <i>Streptococcaceae</i>           | <i>Lactococcus</i>                        | LFD          | 3.589825899       | 8.51E-06  |
| 109    | <i>Firmicutes</i>     | <i>Clostridia</i>            | <i>Clostridiales</i>      | <i>Lachnospiraceae</i>            | <i>unclassified_Lachnospiraceae</i>       | LFD          | 3.462251164       | 0.000515  |
| 137    | <i>Firmicutes</i>     | <i>Clostridia</i>            | <i>Clostridiales</i>      | <i>Lachnospiraceae</i>            | <i>unclassified_Lachnospiraceae</i>       | LFD          | 3.345797064       | 0.028643  |
| 158    | <i>Firmicutes</i>     | <i>Clostridia</i>            | <i>Clostridiales</i>      | <i>Lachnospiraceae</i>            | <i>unclassified_Lachnospiraceae</i>       | LFD          | 3.308857749       | 0.0481984 |
| 37     | <i>Firmicutes</i>     | <i>Clostridia</i>            | <i>Clostridiales</i>      | <i>Peptostreptococcaceae</i>      | <i>unclassified_Peptostreptococcaceae</i> | LFD          | 4.055118466       | 3.22E-06  |
| 319    | <i>Firmicutes</i>     | <i>Clostridia</i>            | <i>Clostridiales</i>      | <i>Ruminococcaceae</i>            | <i>unclassified_Ruminococcaceae</i>       | LFD          | 3.300274656       | 0.0377343 |
| 275    | <i>Firmicutes</i>     | <i>Erysipelotrichi</i>       | <i>Erysipelotrichales</i> | <i>Erysipelotrichaceae</i>        | <i>Turicibacter</i>                       | LFD          | 3.824262017       | 0.0001214 |
| 98     | TM7                   | TM7                          | TM7                       | TM7                               | TM7                                       | LFD          | 3.56002886        | 2.29E-05  |
| 127    | <i>Actinobacteria</i> | <i>Actinobacteria</i>        | <i>Bifidobacteriales</i>  | <i>Bifidobacteriaceae</i>         | <i>Bifidobacterium</i>                    | LFD+CR       | 3.188005229       | 0.0386341 |
| 119    | <i>Bacteroidetes</i>  | <i>Bacteroidia</i>           | <i>Bacteroidales</i>      | <i>Porphyromonadaceae</i>         | <i>Tannerella</i>                         | LFD+CR       | 3.534155124       | 0.0208986 |
| 155    | <i>Bacteroidetes</i>  | <i>Bacteroidia</i>           | <i>Bacteroidales</i>      | <i>Porphyromonadaceae</i>         | <i>Tannerella</i>                         | LFD+CR       | 3.820219305       | 0.005241  |
| 267    | <i>Bacteroidetes</i>  | <i>Bacteroidia</i>           | <i>Bacteroidales</i>      | <i>Porphyromonadaceae</i>         | <i>Tannerella</i>                         | LFD+CR       | 3.388663847       | 0.0183096 |
| 401    | <i>Bacteroidetes</i>  | <i>Bacteroidia</i>           | <i>Bacteroidales</i>      | <i>Rikenellaceae</i>              | <i>Alistipes</i>                          | LFD+CR       | 3.49557915        | 7.68E-05  |
| 2219   | <i>Firmicutes</i>     | <i>Bacilli</i>               | <i>Lactobacillales</i>    | <i>Lactobacillaceae</i>           | <i>Lactobacillus</i>                      | LFD+CR       | 3.247744113       | 3.24E-05  |
| 171    | <i>Firmicutes</i>     | <i>Bacilli</i>               | <i>Lactobacillales</i>    | <i>Lactobacillaceae</i>           | <i>Lactobacillus</i>                      | LFD+CR       | 4.233077538       | 5.82E-08  |
| 45     | <i>Firmicutes</i>     | <i>Bacilli</i>               | <i>Lactobacillales</i>    | <i>Lactobacillaceae</i>           | <i>Lactobacillus</i>                      | LFD+CR       | 4.777967716       | 1.78E-09  |
| 94     | <i>Firmicutes</i>     | <i>Bacilli</i>               | <i>Lactobacillales</i>    | <i>Lactobacillaceae</i>           | <i>Lactobacillus</i>                      | LFD+CR       | 3.477016185       | 2.04E-09  |
| 107    | <i>Firmicutes</i>     | <i>Clostridia</i>            | <i>Clostridiales</i>      | <i>Lachnospiraceae</i>            | <i>unclassified_Lachnospiraceae</i>       | LFD+CR       | 3.193247236       | 0.0242898 |
| 167    | <i>Firmicutes</i>     | <i>Clostridia</i>            | <i>Clostridiales</i>      | <i>Lachnospiraceae</i>            | <i>unclassified_Lachnospiraceae</i>       | LFD+CR       | 3.776316152       | 0.0059123 |
| 215    | <i>Firmicutes</i>     | <i>Clostridia</i>            | <i>Clostridiales</i>      | <i>Lachnospiraceae</i>            | <i>unclassified_Lachnospiraceae</i>       | LFD+CR       | 3.203140408       | 0.024161  |
| 429    | <i>Firmicutes</i>     | <i>Clostridia</i>            | <i>Clostridiales</i>      | <i>Lachnospiraceae</i>            | <i>unclassified_Lachnospiraceae</i>       | LFD+CR       | 3.235403134       | 0.0289817 |
| 56     | <i>Firmicutes</i>     | <i>Clostridia</i>            | <i>Clostridiales</i>      | <i>Lachnospiraceae</i>            | <i>unclassified_Lachnospiraceae</i>       | LFD+CR       | 3.176237582       | 0.0452262 |
| 1648   | <i>Proteobacteria</i> | <i>Epsilonproteobacteria</i> | <i>Campylobacterales</i>  | <i>Helicobacteraceae</i>          | <i>Helicobacter</i>                       | LFD+CR       | 3.345237409       | 0.0151948 |
| 68     | <i>Proteobacteria</i> | <i>Epsilonproteobacteria</i> | <i>Campylobacterales</i>  | <i>Helicobacteraceae</i>          | <i>Helicobacter</i>                       | LFD+CR       | 3.434951149       | 0.0220252 |

**Supplementary Table S2. The phylotypes of gut microbiota differentially abundant between the LFD and LFD+ CR mice at 141 weeks using LEfSe.**

| OTU id | Taxon                 |                                |                                |                                   |                                        | Riched group | LDA Score (log 10) | p value   |
|--------|-----------------------|--------------------------------|--------------------------------|-----------------------------------|----------------------------------------|--------------|--------------------|-----------|
|        | Phylum                | Class                          | Order                          | Family                            | Genus                                  |              |                    |           |
| 2      | <i>Bacteroidetes</i>  | <i>Bacteroidia</i>             | <i>Bacteroidales</i>           | <i>Bacteroidaceae</i>             | <i>Bacteroides</i>                     | LFD          | 4.664610955        | 0.0002907 |
| 32     | <i>Bacteroidetes</i>  | <i>Bacteroidia</i>             | <i>Bacteroidales</i>           | <i>Bacteroidaceae</i>             | <i>Bacteroides</i>                     | LFD          | 4.535055345        | 0.0029167 |
| 64     | <i>Bacteroidetes</i>  | <i>Bacteroidia</i>             | <i>Bacteroidales</i>           | <i>Bacteroidaceae</i>             | <i>Bacteroides</i>                     | LFD          | 4.049256617        | 0.0064179 |
| 359    | <i>Bacteroidetes</i>  | <i>Bacteroidia</i>             | <i>Bacteroidales</i>           | <i>Bacteroidaceae</i>             | <i>Bacteroides</i>                     | LFD          | 3.527444806        | 0.0006587 |
| 1814   | <i>Bacteroidetes</i>  | <i>Bacteroidia</i>             | <i>Bacteroidales</i>           | <i>Bacteroidaceae</i>             | <i>Bacteroides</i>                     | LFD          | 3.280757212        | 0.0171097 |
| 28     | <i>Bacteroidetes</i>  | <i>Bacteroidia</i>             | <i>Bacteroidales</i>           | <i>Porphyromonadaceae</i>         | <i>Parabacteroides</i>                 | LFD          | 3.350061712        | 0.0006587 |
| 161    | <i>Bacteroidetes</i>  | <i>Bacteroidia</i>             | <i>Bacteroidales</i>           | <i>Porphyromonadaceae</i>         | <i>Parabacteroides</i>                 | LFD          | 4.05917781         | 0.0310213 |
| 65     | <i>Firmicutes</i>     | <i>Bacilli</i>                 | <i>Lactobacillales</i>         | <i>Streptococcaceae</i>           | <i>Lactococcus</i>                     | LFD          | 3.470212939        | 0.0013621 |
| 8      | <i>Firmicutes</i>     | <i>Clostridia</i>              | <i>Clostridiales</i>           | <i>Lachnospiraceae</i>            | <i>unclassified_Lachnospiraceae</i>    | LFD          | 3.681947504        | 0.0223864 |
| 18     | <i>Firmicutes</i>     | <i>Clostridia</i>              | <i>Clostridiales</i>           | <i>Lachnospiraceae</i>            | <i>unclassified_Lachnospiraceae</i>    | LFD          | 3.74084249         | 0.0223864 |
| 109    | <i>Firmicutes</i>     | <i>Clostridia</i>              | <i>Clostridiales</i>           | <i>Lachnospiraceae</i>            | <i>unclassified_Lachnospiraceae</i>    | LFD          | 3.344854868        | 0.0006363 |
| 116    | <i>Firmicutes</i>     | <i>Clostridia</i>              | <i>Clostridiales</i>           | <i>Lachnospiraceae</i>            | <i>unclassified_Lachnospiraceae</i>    | LFD          | 3.470720525        | 0.0309853 |
| 146    | <i>Firmicutes</i>     | <i>Clostridia</i>              | <i>Clostridiales</i>           | <i>Lachnospiraceae</i>            | <i>unclassified_Lachnospiraceae</i>    | LFD          | 3.562016593        | 0.0409811 |
| 165    | <i>Firmicutes</i>     | <i>Clostridia</i>              | <i>Clostridiales</i>           | <i>Lachnospiraceae</i>            | <i>unclassified_Lachnospiraceae</i>    | LFD          | 4.260024928        | 0.009266  |
| 186    | <i>Firmicutes</i>     | <i>Clostridia</i>              | <i>Clostridiales</i>           | <i>Lachnospiraceae</i>            | <i>unclassified_Lachnospiraceae</i>    | LFD          | 3.032208863        | 0.0329084 |
| 205    | <i>Firmicutes</i>     | <i>Clostridia</i>              | <i>Clostridiales</i>           | <i>Lachnospiraceae</i>            | <i>unclassified_Lachnospiraceae</i>    | LFD          | 3.258480921        | 0.023159  |
| 211    | <i>Firmicutes</i>     | <i>Clostridia</i>              | <i>Clostridiales</i>           | <i>Lachnospiraceae</i>            | <i>unclassified_Lachnospiraceae</i>    | LFD          | 3.295629717        | 0.0040196 |
| 270    | <i>Firmicutes</i>     | <i>Clostridia</i>              | <i>Clostridiales</i>           | <i>Lachnospiraceae</i>            | <i>unclassified_Lachnospiraceae</i>    | LFD          | 3.252701305        | 0.0146974 |
| 279    | <i>Firmicutes</i>     | <i>Clostridia</i>              | <i>Clostridiales</i>           | <i>Lachnospiraceae</i>            | <i>unclassified_Lachnospiraceae</i>    | LFD          | 3.284036389        | 0.008506  |
| 300    | <i>Firmicutes</i>     | <i>Clostridia</i>              | <i>Clostridiales</i>           | <i>Lachnospiraceae</i>            | <i>unclassified_Lachnospiraceae</i>    | LFD          | 3.20455479         | 0.0426813 |
| 357    | <i>Firmicutes</i>     | <i>Clostridia</i>              | <i>Clostridiales</i>           | <i>Lachnospiraceae</i>            | <i>unclassified_Lachnospiraceae</i>    | LFD          | 3.314070833        | 0.030639  |
| 391    | <i>Firmicutes</i>     | <i>Clostridia</i>              | <i>Clostridiales</i>           | <i>Lachnospiraceae</i>            | <i>unclassified_Lachnospiraceae</i>    | LFD          | 3.334297353        | 0.0309853 |
| 418    | <i>Firmicutes</i>     | <i>Clostridia</i>              | <i>Clostridiales</i>           | <i>Lachnospiraceae</i>            | <i>unclassified_Lachnospiraceae</i>    | LFD          | 3.312117979        | 0.0139421 |
| 878    | <i>Firmicutes</i>     | <i>Clostridia</i>              | <i>Clostridiales</i>           | <i>Lachnospiraceae</i>            | <i>unclassified_Lachnospiraceae</i>    | LFD          | 3.295130868        | 0.0067571 |
| 113    | <i>Firmicutes</i>     | <i>Clostridia</i>              | <i>Clostridiales</i>           | <i>Ruminococcaceae</i>            | <i>Anaerotruncus</i>                   | LFD          | 3.365899684        | 0.0309853 |
| 271    | <i>Firmicutes</i>     | <i>Clostridia</i>              | <i>Clostridiales</i>           | <i>Ruminococcaceae</i>            | <i>unclassified_Ruminococcaceae</i>    | LFD          | 3.751876841        | 0.0060952 |
| 469    | <i>Proteobacteria</i> | <i>Deltaproteobacteria</i>     | <i>Desulfobrivionales</i>      | <i>Desulfobrivionaceae</i>        | <i>Bilophila</i>                       | LFD          | 3.185494208        | 0.0222422 |
| 27     | <i>Actinobacteria</i> | <i>Actinobacteria</i>          | <i>Bifidobacteriales</i>       | <i>Bifidobacteriaceae</i>         | <i>Bifidobacterium</i>                 | LFD+CR       | 3.526214224        | 0.018182  |
| 127    | <i>Actinobacteria</i> | <i>Actinobacteria</i>          | <i>Bifidobacteriales</i>       | <i>Bifidobacteriaceae</i>         | <i>Bifidobacterium</i>                 | LFD+CR       | 3.494137948        | 0.0116483 |
| 119    | <i>Bacteroidetes</i>  | <i>Bacteroidia</i>             | <i>Bacteroidales</i>           | <i>Porphyromonadaceae</i>         | <i>Tannerella</i>                      | LFD+CR       | 4.254104153        | 0.0026384 |
| 155    | <i>Bacteroidetes</i>  | <i>Bacteroidia</i>             | <i>Bacteroidales</i>           | <i>Porphyromonadaceae</i>         | <i>Tannerella</i>                      | LFD+CR       | 4.438143404        | 0.0022427 |
| 267    | <i>Bacteroidetes</i>  | <i>Bacteroidia</i>             | <i>Bacteroidales</i>           | <i>Porphyromonadaceae</i>         | <i>Tannerella</i>                      | LFD+CR       | 4.038756992        | 0.0037396 |
| 77     | <i>Bacteroidetes</i>  | <i>Bacteroidia</i>             | <i>Bacteroidales</i>           | <i>Porphyromonadaceae</i>         | <i>unclassified_Porphyromonadaceae</i> | LFD+CR       | 3.207694391        | 0.0187177 |
| 95     | <i>Bacteroidetes</i>  | <i>Bacteroidia</i>             | <i>Bacteroidales</i>           | <i>Porphyromonadaceae</i>         | <i>unclassified_Porphyromonadaceae</i> | LFD+CR       | 3.603326918        | 0.0018205 |
| 133    | <i>Bacteroidetes</i>  | <i>Bacteroidia</i>             | <i>Bacteroidales</i>           | <i>Porphyromonadaceae</i>         | <i>unclassified_Porphyromonadaceae</i> | LFD+CR       | 4.165967787        | 0.0010726 |
| 169    | <i>Bacteroidetes</i>  | <i>Bacteroidia</i>             | <i>Bacteroidales</i>           | <i>Porphyromonadaceae</i>         | <i>unclassified_Porphyromonadaceae</i> | LFD+CR       | 3.361994083        | 0.041613  |
| 202    | <i>Bacteroidetes</i>  | <i>Bacteroidia</i>             | <i>Bacteroidales</i>           | <i>Porphyromonadaceae</i>         | <i>unclassified_Porphyromonadaceae</i> | LFD+CR       | 3.531989935        | 0.0121577 |
| 280    | <i>Bacteroidetes</i>  | <i>Bacteroidia</i>             | <i>Bacteroidales</i>           | <i>Porphyromonadaceae</i>         | <i>unclassified_Porphyromonadaceae</i> | LFD+CR       | 3.145360411        | 0.0325094 |
| 266    | <i>Bacteroidetes</i>  | <i>Bacteroidia</i>             | <i>Bacteroidales</i>           | <i>Rikenellaceae</i>              | <i>Alistipes</i>                       | LFD+CR       | 3.108725557        | 0.0198409 |
| 401    | <i>Bacteroidetes</i>  | <i>Bacteroidia</i>             | <i>Bacteroidales</i>           | <i>Rikenellaceae</i>              | <i>Alistipes</i>                       | LFD+CR       | 3.193451285        | 0.0325094 |
| 36     | <i>Bacteroidetes</i>  | <i>Bacteroidia</i>             | <i>Bacteroidales</i>           | <i>unclassified_Bacteroidales</i> | <i>unclassified_Bacteroidales</i>      | LFD+CR       | 3.452216999        | 0.0290139 |
| 149    | <i>Bacteroidetes</i>  | <i>Bacteroidia</i>             | <i>Bacteroidales</i>           | <i>unclassified_Bacteroidales</i> | <i>unclassified_Bacteroidales</i>      | LFD+CR       | 4.040868034        | 0.0194779 |
| 151    | <i>Bacteroidetes</i>  | <i>Bacteroidia</i>             | <i>Bacteroidales</i>           | <i>unclassified_Bacteroidales</i> | <i>unclassified_Bacteroidales</i>      | LFD+CR       | 3.446905993        | 0.0154685 |
| 371    | <i>Bacteroidetes</i>  | <i>Bacteroidia</i>             | <i>Bacteroidales</i>           | <i>unclassified_Bacteroidales</i> | <i>unclassified_Bacteroidales</i>      | LFD+CR       | 3.542915229        | 0.0077159 |
| 372    | <i>Bacteroidetes</i>  | <i>Bacteroidia</i>             | <i>Bacteroidales</i>           | <i>unclassified_Bacteroidales</i> | <i>unclassified_Bacteroidales</i>      | LFD+CR       | 3.432205144        | 0.0325094 |
| 411    | <i>Bacteroidetes</i>  | <i>Bacteroidia</i>             | <i>Bacteroidales</i>           | <i>unclassified_Bacteroidales</i> | <i>unclassified_Bacteroidales</i>      | LFD+CR       | 3.397278522        | 0.0232056 |
| 45     | <i>Firmicutes</i>     | <i>Bacilli</i>                 | <i>Lactobacillales</i>         | <i>Lactobacillaceae</i>           | <i>Lactobacillus</i>                   | LFD+CR       | 3.926391919        | 0.0004215 |
| 171    | <i>Firmicutes</i>     | <i>Bacilli</i>                 | <i>Lactobacillales</i>         | <i>Lactobacillaceae</i>           | <i>Lactobacillus</i>                   | LFD+CR       | 3.170648335        | 0.0325094 |
| 104    | <i>Firmicutes</i>     | <i>Clostridia</i>              | <i>Clostridiales</i>           | <i>Ruminococcaceae</i>            | <i>unclassified_Ruminococcaceae</i>    | LFD+CR       | 3.19605109         | 0.037373  |
| 130    | <i>Firmicutes</i>     | <i>Clostridia</i>              | <i>Clostridiales</i>           | <i>unclassified_Clostridiales</i> | <i>unclassified_Clostridiales</i>      | LFD+CR       | 3.179064242        | 0.0232056 |
| 4      | <i>Firmicutes</i>     | <i>Erysipelotrichi</i>         | <i>Erysipelotrichales</i>      | <i>Erysipelotrichaceae</i>        | <i>Allobaculum</i>                     | LFD+CR       | 4.395047933        | 0.0037396 |
| 80     | <i>Firmicutes</i>     | <i>Erysipelotrichi</i>         | <i>Erysipelotrichales</i>      | <i>Erysipelotrichaceae</i>        | <i>Allobaculum</i>                     | LFD+CR       | 3.509490951        | 0.009266  |
| 118    | <i>Firmicutes</i>     | <i>Erysipelotrichi</i>         | <i>Erysipelotrichales</i>      | <i>Erysipelotrichaceae</i>        | <i>Allobaculum</i>                     | LFD+CR       | 3.096987174        | 0.0198409 |
| 340    | <i>Firmicutes</i>     | <i>unclassified_Firmicutes</i> | <i>unclassified_Firmicutes</i> | <i>unclassified_Firmicutes</i>    | <i>unclassified_Firmicutes</i>         | LFD+CR       | 3.497072446        | 0.0065515 |

**Supplementary Table S3. The phylotypes of gut microbiota differentially abundant between the HFD and HFD+ CR mice at 62 weeks using LEfSe.**

| OTU id | Taxon                 |                            |                           |                              |                    | Riched group | LDA Score (log10) | p value   |
|--------|-----------------------|----------------------------|---------------------------|------------------------------|--------------------|--------------|-------------------|-----------|
|        | Phylum                | Class                      | Order                     | Family                       | Genus              |              |                   |           |
| 201    | <i>Bacteroidetes</i>  | <i>Bacteroidia</i>         | <i>Bacteroidales</i>      | <i>Bacteroidaceae</i>        | <i>Bacteroides</i> | HFD 62w      | 3.176948567       | 0.0217163 |
| 197    | <i>Bacteroidetes</i>  | <i>Bacteroidia</i>         | <i>Bacteroidales</i>      | <i>Rikenellaceae</i>         | <i>Alistipes</i>   | HFD 62w      | 3.604770481       | 0.0311649 |
| 603    | <i>Bacteroidetes</i>  | <i>Bacteroidia</i>         | <i>Bacteroidales</i>      | <i>Rikenellaceae</i>         | <i>Rikenella</i>   | HFD 62w      | 3.285106054       | 0.01147   |
| 366    | <i>Bacteroidetes</i>  | <i>Bacteroidia</i>         | <i>Bacteroidales</i>      |                              |                    | HFD 62w      | 3.54638156        | 0.0167422 |
| 65     | <i>Firmicutes</i>     | <i>Bacilli</i>             | <i>Lactobacillales</i>    | <i>Streptococcaceae</i>      | <i>Lactococcus</i> | HFD 62w      | 4.044902641       | 9.557E-07 |
| 56     | <i>Firmicutes</i>     | <i>Clostridia</i>          | <i>Clostridiales</i>      | <i>Lachnospiraceae</i>       |                    | HFD 62w      | 3.407139746       | 0.0332791 |
| 37     | <i>Firmicutes</i>     | <i>Clostridia</i>          | <i>Clostridiales</i>      | <i>Peptostreptococcaceae</i> |                    | HFD 62w      | 4.019781623       | 3.838E-05 |
| 272    | <i>Firmicutes</i>     | <i>Clostridia</i>          | <i>Clostridiales</i>      | <i>Peptostreptococcaceae</i> |                    | HFD 62w      | 3.198120582       | 3.05E-05  |
| 67     | <i>Firmicutes</i>     | <i>Clostridia</i>          | <i>Clostridiales</i>      | <i>Ruminococcaceae</i>       |                    | HFD 62w      | 2.961705141       | 0.01699   |
| 111    | <i>Firmicutes</i>     | <i>Clostridia</i>          | <i>Clostridiales</i>      | <i>Ruminococcaceae</i>       |                    | HFD 62w      | 2.908277051       | 0.0037356 |
| 383    | <i>Firmicutes</i>     | <i>Clostridia</i>          | <i>Clostridiales</i>      | <i>Ruminococcaceae</i>       |                    | HFD 62w      | 3.29613159        | 0.0008372 |
| 274    | <i>Firmicutes</i>     | <i>Erysipelotrichi</i>     | <i>Erysipelotrichales</i> | <i>Erysipelotrichaceae</i>   | <i>Allobaculum</i> | HFD 62w      | 3.020033245       | 0.0148607 |
| 136    | <i>Actinobacteria</i> | <i>Actinobacteria</i>      | <i>Coriobacteriales</i>   | <i>Coriobacteriaceae</i>     |                    | HFD+CR 62w   | -3.297986153      | 0.0067829 |
| 119    | <i>Bacteroidetes</i>  | <i>Bacteroidia</i>         | <i>Bacteroidales</i>      | <i>Porphyromonadaceae</i>    | <i>Tannerella</i>  | HFD+CR 62w   | -3.679871117      | 1.091E-05 |
| 155    | <i>Bacteroidetes</i>  | <i>Bacteroidia</i>         | <i>Bacteroidales</i>      | <i>Porphyromonadaceae</i>    | <i>Tannerella</i>  | HFD+CR 62w   | -3.980043818      | 3.848E-06 |
| 267    | <i>Bacteroidetes</i>  | <i>Bacteroidia</i>         | <i>Bacteroidales</i>      | <i>Porphyromonadaceae</i>    | <i>Tannerella</i>  | HFD+CR 62w   | -3.536213343      | 3.276E-05 |
| 95     | <i>Bacteroidetes</i>  | <i>Bacteroidia</i>         | <i>Bacteroidales</i>      | <i>Porphyromonadaceae</i>    |                    | HFD+CR 62w   | -3.082032334      | 0.0496024 |
| 97     | <i>Bacteroidetes</i>  | <i>Bacteroidia</i>         | <i>Bacteroidales</i>      | <i>Porphyromonadaceae</i>    |                    | HFD+CR 62w   | -3.741273501      | 4.692E-05 |
| 105    | <i>Bacteroidetes</i>  | <i>Bacteroidia</i>         | <i>Bacteroidales</i>      | <i>Porphyromonadaceae</i>    |                    | HFD+CR 62w   | -3.041747706      | 0.0143589 |
| 133    | <i>Bacteroidetes</i>  | <i>Bacteroidia</i>         | <i>Bacteroidales</i>      | <i>Porphyromonadaceae</i>    |                    | HFD+CR 62w   | -3.504805533      | 0.0052153 |
| 302    | <i>Bacteroidetes</i>  | <i>Bacteroidia</i>         | <i>Bacteroidales</i>      | <i>Porphyromonadaceae</i>    |                    | HFD+CR 62w   | -3.035750534      | 0.0372928 |
| 317    | <i>Bacteroidetes</i>  | <i>Bacteroidia</i>         | <i>Bacteroidales</i>      | <i>Porphyromonadaceae</i>    |                    | HFD+CR 62w   | -3.238369838      | 0.0050136 |
| 203    | <i>Bacteroidetes</i>  | <i>Bacteroidia</i>         | <i>Bacteroidales</i>      | <i>Prevotellaceae</i>        |                    | HFD+CR 62w   | -2.867921832      | 0.037927  |
| 148    | <i>Bacteroidetes</i>  | <i>Bacteroidia</i>         | <i>Bacteroidales</i>      |                              |                    | HFD+CR 62w   | -3.094052222      | 0.0123578 |
| 372    | <i>Bacteroidetes</i>  | <i>Bacteroidia</i>         | <i>Bacteroidales</i>      |                              |                    | HFD+CR 62w   | -3.506072058      | 1.584E-06 |
| 388    | <i>Bacteroidetes</i>  | <i>Bacteroidia</i>         | <i>Bacteroidales</i>      |                              |                    | HFD+CR 62w   | -3.403292555      | 0.0001101 |
| 224    | <i>Firmicutes</i>     | <i>Clostridia</i>          | <i>Clostridiales</i>      | <i>Lachnospiraceae</i>       |                    | HFD+CR 62w   | -3.27163541       | 0.010389  |
| 79     | <i>Firmicutes</i>     | <i>Clostridia</i>          | <i>Clostridiales</i>      | <i>Ruminococcaceae</i>       |                    | HFD+CR 62w   | -3.083050938      | 0.0039614 |
| 118    | <i>Firmicutes</i>     | <i>Erysipelotrichi</i>     | <i>Erysipelotrichales</i> | <i>Erysipelotrichaceae</i>   | <i>Allobaculum</i> | HFD+CR 62w   | -3.212688875      | 0.0243299 |
| 30     | <i>Proteobacteria</i> | <i>Deltaproteobacteria</i> | <i>Desulfobivriales</i>   | <i>Desulfobivriaceae</i>     | <i>Bilophila</i>   | HFD+CR 62w   | -3.764877032      | 0.0159383 |

**Supplementary Table S4. The phylotypes of gut microbiota differentially abundant between 62 weeks and 141 weeks of LFD mice at using LEfSe.**

| OTU id | Taxon                 |                            |                                    |                                    |                                       | Riched group | LDA Score (log10) | p value   |
|--------|-----------------------|----------------------------|------------------------------------|------------------------------------|---------------------------------------|--------------|-------------------|-----------|
|        | Phylum                | Class                      | Order                              | Family                             | Genus                                 |              |                   |           |
| 2      | <i>Bacteroidetes</i>  | <i>Bacteroidia</i>         | <i>Bacteroidales</i>               | <i>Bacteroidaceae</i>              | <i>Bacteroides</i>                    | LFD 141w     | 4.631740467       | 0.0155676 |
| 32     | <i>Bacteroidetes</i>  | <i>Bacteroidia</i>         | <i>Bacteroidales</i>               | <i>Bacteroidaceae</i>              | <i>Bacteroides</i>                    | LFD 141w     | 4.514991056       | 0.0073971 |
| 58     | <i>Bacteroidetes</i>  | <i>Bacteroidia</i>         | <i>Bacteroidales</i>               | <i>Bacteroidaceae</i>              | <i>Bacteroides</i>                    | LFD 141w     | 4.207613699       | 0.0415959 |
| 64     | <i>Bacteroidetes</i>  | <i>Bacteroidia</i>         | <i>Bacteroidales</i>               | <i>Bacteroidaceae</i>              | <i>Bacteroides</i>                    | LFD 141w     | 4.078467675       | 0.0104056 |
| 359    | <i>Bacteroidetes</i>  | <i>Bacteroidia</i>         | <i>Bacteroidales</i>               | <i>Bacteroidaceae</i>              | <i>Bacteroides</i>                    | LFD 141w     | 3.80021585        | 0.0222296 |
| 28     | <i>Bacteroidetes</i>  | <i>Bacteroidia</i>         | <i>Bacteroidales</i>               | <i>Porphyromonadaceae</i>          | <i>Parabacteroides</i>                | LFD 141w     | 3.451031169       | 0.0495102 |
| 142    | <i>Bacteroidetes</i>  | <i>Bacteroidia</i>         | <i>Bacteroidales</i>               | <i>Porphyromonadaceae</i>          | <i>Parabacteroides</i>                | LFD 141w     | 3.756452645       | 0.0055875 |
| 161    | <i>Bacteroidetes</i>  | <i>Bacteroidia</i>         | <i>Bacteroidales</i>               | <i>Porphyromonadaceae</i>          | <i>Parabacteroides</i>                | LFD 141w     | 4.050020758       | 0.0495102 |
| 8      | <i>Firmicutes</i>     | <i>Clostridia</i>          | <i>Clostridiales</i>               | <i>Lachnospiraceae</i>             | <i>unclassified_Lachnospiraceae</i>   | LFD 141w     | 3.736077439       | 0.0249747 |
| 18     | <i>Firmicutes</i>     | <i>Clostridia</i>          | <i>Clostridiales</i>               | <i>Lachnospiraceae</i>             | <i>unclassified_Lachnospiraceae</i>   | LFD 141w     | 3.883117836       | 0.0078928 |
| 76     | <i>Firmicutes</i>     | <i>Clostridia</i>          | <i>Clostridiales</i>               | <i>Lachnospiraceae</i>             | <i>unclassified_Lachnospiraceae</i>   | LFD 141w     | 3.704765195       | 0.0239683 |
| 186    | <i>Firmicutes</i>     | <i>Clostridia</i>          | <i>Clostridiales</i>               | <i>Lachnospiraceae</i>             | <i>unclassified_Lachnospiraceae</i>   | LFD 141w     | 3.426317393       | 0.0222296 |
| 206    | <i>Firmicutes</i>     | <i>Clostridia</i>          | <i>Clostridiales</i>               | <i>Lachnospiraceae</i>             | <i>unclassified_Lachnospiraceae</i>   | LFD 141w     | 3.644114416       | 0.0210252 |
| 270    | <i>Firmicutes</i>     | <i>Clostridia</i>          | <i>Clostridiales</i>               | <i>Lachnospiraceae</i>             | <i>unclassified_Lachnospiraceae</i>   | LFD 141w     | 3.467560894       | 0.0222296 |
| 279    | <i>Firmicutes</i>     | <i>Clostridia</i>          | <i>Clostridiales</i>               | <i>Lachnospiraceae</i>             | <i>unclassified_Lachnospiraceae</i>   | LFD 141w     | 3.473310618       | 0.0415959 |
| 300    | <i>Firmicutes</i>     | <i>Clostridia</i>          | <i>Clostridiales</i>               | <i>Lachnospiraceae</i>             | <i>unclassified_Lachnospiraceae</i>   | LFD 141w     | 3.463392319       | 0.0210252 |
| 357    | <i>Firmicutes</i>     | <i>Clostridia</i>          | <i>Clostridiales</i>               | <i>Lachnospiraceae</i>             | <i>unclassified_Lachnospiraceae</i>   | LFD 141w     | 3.456000581       | 0.0078928 |
| 271    | <i>Firmicutes</i>     | <i>Clostridia</i>          | <i>Clostridiales</i>               | <i>Ruminococcaceae</i>             | <i>unclassified_Ruminococcaceae</i>   | LFD 141w     | 3.805031233       | 0.0055875 |
| 30     | <i>Proteobacteria</i> | <i>Deltaproteobacteria</i> | <i>Desulfovibrionales</i>          | <i>Desulfovibrionaceae</i>         | <i>Bilophila</i>                      | LFD 141w     | 4.47346355        | 0.0163092 |
| 469    | <i>Proteobacteria</i> | <i>Deltaproteobacteria</i> | <i>Desulfovibrionales</i>          | <i>Desulfovibrionaceae</i>         | <i>Bilophila</i>                      | LFD 141w     | 3.494964192       | 0.0073971 |
| 27     | <i>Actinobacteria</i> | <i>Actinobacteria</i>      | <i>Bifidobacteriales</i>           | <i>Bifidobacteriaceae</i>          | <i>Bifidobacterium</i>                | LFD 62w      | 3.526175806       | 0.0308885 |
| 127    | <i>Actinobacteria</i> | <i>Actinobacteria</i>      | <i>Bifidobacteriales</i>           | <i>Bifidobacteriaceae</i>          | <i>Bifidobacterium</i>                | LFD 62w      | 3.508570096       | 0.0222296 |
| 136    | <i>Actinobacteria</i> | <i>Actinobacteria</i>      | <i>Coriobacteriales</i>            | <i>Coriobacteriaceae</i>           | <i>unclassified_Coriobacteriaceae</i> | LFD 62w      | 3.47889475        | 0.0073971 |
| 78     | <i>Actinobacteria</i> | <i>Actinobacteria</i>      | <i>unclassified_Actinobacteria</i> | <i>unclassified_Actinobacteria</i> | <i>unclassified_Actinobacteria</i>    | LFD 62w      | 3.529626712       | 0.0495102 |
| 61     | <i>Bacteroidetes</i>  | <i>Bacteroidia</i>         | <i>Bacteroidales</i>               | <i>unclassified_Bacteroidales</i>  | <i>unclassified_Bacteroidales</i>     | LFD 62w      | 3.481228079       | 0.0493362 |
| 151    | <i>Bacteroidetes</i>  | <i>Bacteroidia</i>         | <i>Bacteroidales</i>               | <i>unclassified_Bacteroidales</i>  | <i>unclassified_Bacteroidales</i>     | LFD 62w      | 3.610210014       | 0.0224867 |
| 362    | <i>Bacteroidetes</i>  | <i>Bacteroidia</i>         | <i>Bacteroidales</i>               | <i>unclassified_Bacteroidales</i>  | <i>unclassified_Bacteroidales</i>     | LFD 62w      | 3.852380231       | 0.0222296 |
| 371    | <i>Bacteroidetes</i>  | <i>Bacteroidia</i>         | <i>Bacteroidales</i>               | <i>unclassified_Bacteroidales</i>  | <i>unclassified_Bacteroidales</i>     | LFD 62w      | 3.750700751       | 0.0144833 |
| 190    | <i>Firmicutes</i>     | <i>Clostridia</i>          | <i>Clostridiales</i>               | <i>Lachnospiraceae</i>             | <i>unclassified_Lachnospiraceae</i>   | LFD 62w      | 3.571596873       | 0.0073971 |
| 4      | <i>Firmicutes</i>     | <i>Erysipelotrichi</i>     | <i>Erysipelotrichales</i>          | <i>Erysipelotrichaceae</i>         | <i>Allobaculum</i>                    | LFD 62w      | 4.928914395       | 0.0308885 |
| 50     | <i>Firmicutes</i>     | <i>Erysipelotrichi</i>     | <i>Erysipelotrichales</i>          | <i>Erysipelotrichaceae</i>         | <i>Allobaculum</i>                    | LFD 62w      | 4.348260668       | 0.0495102 |
| 80     | <i>Firmicutes</i>     | <i>Erysipelotrichi</i>     | <i>Erysipelotrichales</i>          | <i>Erysipelotrichaceae</i>         | <i>Allobaculum</i>                    | LFD 62w      | 4.220165781       | 0.0047627 |
| 83     | <i>Firmicutes</i>     | <i>Erysipelotrichi</i>     | <i>Erysipelotrichales</i>          | <i>Erysipelotrichaceae</i>         | <i>Allobaculum</i>                    | LFD 62w      | 3.456317931       | 0.0222296 |
| 110    | <i>Firmicutes</i>     | <i>Erysipelotrichi</i>     | <i>Erysipelotrichales</i>          | <i>Erysipelotrichaceae</i>         | <i>Allobaculum</i>                    | LFD 62w      | 3.734571074       | 0.0495102 |
| 134    | <i>Firmicutes</i>     | <i>Erysipelotrichi</i>     | <i>Erysipelotrichales</i>          | <i>Erysipelotrichaceae</i>         | <i>Allobaculum</i>                    | LFD 62w      | 3.670708642       | 0.0495102 |
| 251    | <i>Firmicutes</i>     | <i>Erysipelotrichi</i>     | <i>Erysipelotrichales</i>          | <i>Erysipelotrichaceae</i>         | <i>Allobaculum</i>                    | LFD 62w      | 3.548367455       | 0.0222296 |
| 252    | <i>Firmicutes</i>     | <i>Erysipelotrichi</i>     | <i>Erysipelotrichales</i>          | <i>Erysipelotrichaceae</i>         | <i>Allobaculum</i>                    | LFD 62w      | 3.419144203       | 0.0222296 |
| 261    | <i>Firmicutes</i>     | <i>Erysipelotrichi</i>     | <i>Erysipelotrichales</i>          | <i>Erysipelotrichaceae</i>         | <i>Allobaculum</i>                    | LFD 62w      | 3.433024354       | 0.0222296 |
| 592    | <i>Firmicutes</i>     | <i>Erysipelotrichi</i>     | <i>Erysipelotrichales</i>          | <i>Erysipelotrichaceae</i>         | <i>Allobaculum</i>                    | LFD 62w      | 3.714465991       | 0.0222296 |
| 602    | <i>Firmicutes</i>     | <i>Erysipelotrichi</i>     | <i>Erysipelotrichales</i>          | <i>Erysipelotrichaceae</i>         | <i>Allobaculum</i>                    | LFD 62w      | 3.50866848        | 0.0222296 |
| 646    | <i>Firmicutes</i>     | <i>Erysipelotrichi</i>     | <i>Erysipelotrichales</i>          | <i>Erysipelotrichaceae</i>         | <i>Allobaculum</i>                    | LFD 62w      | 3.574437836       | 0.0222296 |

**Supplementary Table S5. The phylotypes of gut microbiota differentially abundant between 62 weeks and 141 weeks of LFD+CR mice at using LefSe.**

| OTU id | Taxon                 |                                |                                    |                                    |                                       | Riched group | LDA Score (log10) | p value   |
|--------|-----------------------|--------------------------------|------------------------------------|------------------------------------|---------------------------------------|--------------|-------------------|-----------|
|        | Phylum                | Class                          | Order                              | Family                             | Genus                                 |              |                   |           |
| 1      | <i>Bacteroidetes</i>  | <i>Bacteroidia</i>             | <i>Bacteroidales</i>               | <i>Bacteroidaceae</i>              | <i>Bacteroides</i>                    | LFD+CR 141w  | 3.0969322         | 0.0070847 |
| 58     | <i>Bacteroidetes</i>  | <i>Bacteroidia</i>             | <i>Bacteroidales</i>               | <i>Bacteroidaceae</i>              | <i>Bacteroides</i>                    | LFD+CR 141w  | 3.625619109       | 0.0023601 |
| 64     | <i>Bacteroidetes</i>  | <i>Bacteroidia</i>             | <i>Bacteroidales</i>               | <i>Bacteroidaceae</i>              | <i>Bacteroides</i>                    | LFD+CR 141w  | 3.554851109       | 0.0009316 |
| 173    | <i>Bacteroidetes</i>  | <i>Bacteroidia</i>             | <i>Bacteroidales</i>               | <i>Bacteroidaceae</i>              | <i>Bacteroides</i>                    | LFD+CR 141w  | 4.15062865        | 0.0006218 |
| 243    | <i>Bacteroidetes</i>  | <i>Bacteroidia</i>             | <i>Bacteroidales</i>               | <i>Bacteroidaceae</i>              | <i>Bacteroides</i>                    | LFD+CR 141w  | 3.23311406        | 0.0413277 |
| 623    | <i>Bacteroidetes</i>  | <i>Bacteroidia</i>             | <i>Bacteroidales</i>               | <i>Bacteroidaceae</i>              | <i>Bacteroides</i>                    | LFD+CR 141w  | 3.546105153       | 0.0053026 |
| 1732   | <i>Bacteroidetes</i>  | <i>Bacteroidia</i>             | <i>Bacteroidales</i>               | <i>Bacteroidaceae</i>              | <i>Bacteroides</i>                    | LFD+CR 141w  | 3.443172744       | 0.0009332 |
| 142    | <i>Bacteroidetes</i>  | <i>Bacteroidia</i>             | <i>Bacteroidales</i>               | <i>Porphyromonadaceae</i>          | <i>Parabacteroides</i>                | LFD+CR 141w  | 3.607881539       | 0.0013089 |
| 119    | <i>Bacteroidetes</i>  | <i>Bacteroidia</i>             | <i>Bacteroidales</i>               | <i>Porphyromonadaceae</i>          | <i>Tannerella</i>                     | LFD+CR 141w  | 4.004177601       | 0.0010487 |
| 155    | <i>Bacteroidetes</i>  | <i>Bacteroidia</i>             | <i>Bacteroidales</i>               | <i>Porphyromonadaceae</i>          | <i>Tannerella</i>                     | LFD+CR 141w  | 4.162701352       | 0.0036868 |
| 267    | <i>Bacteroidetes</i>  | <i>Bacteroidia</i>             | <i>Bacteroidales</i>               | <i>Porphyromonadaceae</i>          | <i>Tannerella</i>                     | LFD+CR 141w  | 3.735146654       | 0.0070099 |
| 963    | <i>Bacteroidetes</i>  | <i>Bacteroidia</i>             | <i>Bacteroidales</i>               | <i>Porphyromonadaceae</i>          | <i>Tannerella</i>                     | LFD+CR 141w  | 3.455146744       | 0.0141727 |
| 77     | <i>Bacteroidetes</i>  | <i>Bacteroidia</i>             | <i>Bacteroidales</i>               | <i>Porphyromonadaceae</i>          | <i>mclassified_Porphyromonadaceae</i> | LFD+CR 141w  | 3.143478576       | 0.0020629 |
| 88     | <i>Bacteroidetes</i>  | <i>Bacteroidia</i>             | <i>Bacteroidales</i>               | <i>Porphyromonadaceae</i>          | <i>mclassified_Porphyromonadaceae</i> | LFD+CR 141w  | 4.460082006       | 0.0053389 |
| 95     | <i>Bacteroidetes</i>  | <i>Bacteroidia</i>             | <i>Bacteroidales</i>               | <i>Porphyromonadaceae</i>          | <i>mclassified_Porphyromonadaceae</i> | LFD+CR 141w  | 3.370258468       | 0.0294359 |
| 97     | <i>Bacteroidetes</i>  | <i>Bacteroidia</i>             | <i>Bacteroidales</i>               | <i>Porphyromonadaceae</i>          | <i>mclassified_Porphyromonadaceae</i> | LFD+CR 141w  | 3.586071129       | 0.0065914 |
| 133    | <i>Bacteroidetes</i>  | <i>Bacteroidia</i>             | <i>Bacteroidales</i>               | <i>Porphyromonadaceae</i>          | <i>mclassified_Porphyromonadaceae</i> | LFD+CR 141w  | 4.156102649       | 1.21E-05  |
| 169    | <i>Bacteroidetes</i>  | <i>Bacteroidia</i>             | <i>Bacteroidales</i>               | <i>Porphyromonadaceae</i>          | <i>mclassified_Porphyromonadaceae</i> | LFD+CR 141w  | 3.585976841       | 7.53E-06  |
| 202    | <i>Bacteroidetes</i>  | <i>Bacteroidia</i>             | <i>Bacteroidales</i>               | <i>Porphyromonadaceae</i>          | <i>mclassified_Porphyromonadaceae</i> | LFD+CR 141w  | 3.389202775       | 0.0479373 |
| 280    | <i>Bacteroidetes</i>  | <i>Bacteroidia</i>             | <i>Bacteroidales</i>               | <i>Porphyromonadaceae</i>          | <i>mclassified_Porphyromonadaceae</i> | LFD+CR 141w  | 3.352335091       | 0.0084241 |
| 282    | <i>Bacteroidetes</i>  | <i>Bacteroidia</i>             | <i>Bacteroidales</i>               | <i>Porphyromonadaceae</i>          | <i>mclassified_Porphyromonadaceae</i> | LFD+CR 141w  | 3.30857375        | 0.0013891 |
| 302    | <i>Bacteroidetes</i>  | <i>Bacteroidia</i>             | <i>Bacteroidales</i>               | <i>Porphyromonadaceae</i>          | <i>mclassified_Porphyromonadaceae</i> | LFD+CR 141w  | 3.352776728       | 0.0237567 |
| 363    | <i>Bacteroidetes</i>  | <i>Bacteroidia</i>             | <i>Bacteroidales</i>               | <i>Porphyromonadaceae</i>          | <i>mclassified_Porphyromonadaceae</i> | LFD+CR 141w  | 3.44371154        | 0.0119975 |
| 395    | <i>Bacteroidetes</i>  | <i>Bacteroidia</i>             | <i>Bacteroidales</i>               | <i>Porphyromonadaceae</i>          | <i>mclassified_Porphyromonadaceae</i> | LFD+CR 141w  | 3.135311506       | 0.0060251 |
| 544    | <i>Bacteroidetes</i>  | <i>Bacteroidia</i>             | <i>Bacteroidales</i>               | <i>Porphyromonadaceae</i>          | <i>mclassified_Porphyromonadaceae</i> | LFD+CR 141w  | 3.541918594       | 0.0013891 |
| 197    | <i>Bacteroidetes</i>  | <i>Bacteroidia</i>             | <i>Bacteroidales</i>               | <i>Rikenellaceae</i>               | <i>Alistipes</i>                      | LFD+CR 141w  | 3.739282696       | 0.0029878 |
| 238    | <i>Bacteroidetes</i>  | <i>Bacteroidia</i>             | <i>Bacteroidales</i>               | <i>Rikenellaceae</i>               | <i>Alistipes</i>                      | LFD+CR 141w  | 3.212395647       | 0.0081218 |
| 365    | <i>Bacteroidetes</i>  | <i>Bacteroidia</i>             | <i>Bacteroidales</i>               | <i>Rikenellaceae</i>               | <i>Alistipes</i>                      | LFD+CR 141w  | 3.955909724       | 0.0009755 |
| 36     | <i>Bacteroidetes</i>  | <i>Bacteroidia</i>             | <i>Bacteroidales</i>               | <i>unclassified_Bacteroidales</i>  | <i>unclassified_Bacteroidales</i>     | LFD+CR 141w  | 3.402350695       | 0.0156895 |
| 148    | <i>Bacteroidetes</i>  | <i>Bacteroidia</i>             | <i>Bacteroidales</i>               | <i>unclassified_Bacteroidales</i>  | <i>unclassified_Bacteroidales</i>     | LFD+CR 141w  | 3.505935801       | 0.0027921 |
| 149    | <i>Bacteroidetes</i>  | <i>Bacteroidia</i>             | <i>Bacteroidales</i>               | <i>unclassified_Bacteroidales</i>  | <i>unclassified_Bacteroidales</i>     | LFD+CR 141w  | 3.933370923       | 0.0135891 |
| 162    | <i>Bacteroidetes</i>  | <i>Bacteroidia</i>             | <i>Bacteroidales</i>               | <i>unclassified_Bacteroidales</i>  | <i>unclassified_Bacteroidales</i>     | LFD+CR 141w  | 3.199768967       | 0.0180926 |
| 393    | <i>Bacteroidetes</i>  | <i>Bacteroidia</i>             | <i>Bacteroidales</i>               | <i>unclassified_Bacteroidales</i>  | <i>unclassified_Bacteroidales</i>     | LFD+CR 141w  | 3.14070003        | 0.0398618 |
| 411    | <i>Bacteroidetes</i>  | <i>Bacteroidia</i>             | <i>Bacteroidales</i>               | <i>unclassified_Bacteroidales</i>  | <i>unclassified_Bacteroidales</i>     | LFD+CR 141w  | 3.244878014       | 0.0092355 |
| 76     | <i>Firmicutes</i>     | <i>Clostridia</i>              | <i>Clostridiales</i>               | <i>Lachnospiraceae</i>             | <i>unclassified_Lachnospiraceae</i>   | LFD+CR 141w  | 3.301916984       | 0.0027243 |
| 101    | <i>Firmicutes</i>     | <i>Clostridia</i>              | <i>Clostridiales</i>               | <i>Ruminococcaceae</i>             | <i>Papillibacter</i>                  | LFD+CR 141w  | 3.252061789       | 0.0205306 |
| 271    | <i>Firmicutes</i>     | <i>Clostridia</i>              | <i>Clostridiales</i>               | <i>Ruminococcaceae</i>             | <i>unclassified_Ruminococcaceae</i>   | LFD+CR 141w  | 3.15859468        | 0.0138786 |
| 130    | <i>Firmicutes</i>     | <i>Clostridia</i>              | <i>Clostridiales</i>               | <i>unclassified_Clostridiales</i>  | <i>unclassified_Clostridiales</i>     | LFD+CR 141w  | 3.201037496       | 0.0121571 |
| 340    | <i>Firmicutes</i>     | <i>unclassified_Firmicutes</i> | <i>unclassified_Firmicutes</i>     | <i>unclassified_Firmicutes</i>     | <i>unclassified_Firmicutes</i>        | LFD+CR 141w  | 3.417317548       | 0.0218347 |
| 30     | <i>Proteobacteria</i> | <i>Deltaproteobacteria</i>     | <i>Desulfovibrionales</i>          | <i>Desulfovibrionaceae</i>         | <i>Bilophila</i>                      | LFD+CR 141w  | 3.98159411        | 0.0051139 |
| 98     | <i>TM7</i>            | <i>TM7</i>                     | <i>TM7</i>                         | <i>TM7</i>                         | <i>TM7</i>                            | LFD+CR 141w  | 3.315465909       | 0.0056213 |
| 127    | <i>Actinobacteria</i> | <i>Actinobacteria</i>          | <i>Bifidobacteriales</i>           | <i>Bifidobacteriaceae</i>          | <i>Bifidobacterium</i>                | LFD+CR 62w   | 3.387708547       | 0.0210453 |
| 78     | <i>Actinobacteria</i> | <i>Actinobacteria</i>          | <i>unclassified_Actinobacteria</i> | <i>unclassified_Actinobacteria</i> | <i>unclassified_Actinobacteria</i>    | LFD+CR 62w   | 3.712032344       | 0.0272958 |
| 250    | <i>Actinobacteria</i> | <i>Actinobacteria</i>          | <i>unclassified_Actinobacteria</i> | <i>unclassified_Actinobacteria</i> | <i>unclassified_Actinobacteria</i>    | LFD+CR 62w   | 3.337765569       | 0.0053026 |
| 45     | <i>Firmicutes</i>     | <i>Bacilli</i>                 | <i>Lactobacillales</i>             | <i>Lactobacillaceae</i>            | <i>Lactobacillus</i>                  | LFD+CR 62w   | 4.842011044       | 1.76E-05  |
| 94     | <i>Firmicutes</i>     | <i>Bacilli</i>                 | <i>Lactobacillales</i>             | <i>Lactobacillaceae</i>            | <i>Lactobacillus</i>                  | LFD+CR 62w   | 3.674075708       | 1.77E-05  |
| 171    | <i>Firmicutes</i>     | <i>Bacilli</i>                 | <i>Lactobacillales</i>             | <i>Lactobacillaceae</i>            | <i>Lactobacillus</i>                  | LFD+CR 62w   | 4.293138907       | 0.0006114 |
| 2219   | <i>Firmicutes</i>     | <i>Bacilli</i>                 | <i>Lactobacillales</i>             | <i>Lactobacillaceae</i>            | <i>Lactobacillus</i>                  | LFD+CR 62w   | 3.484890578       | 0.0003401 |
| 109    | <i>Firmicutes</i>     | <i>Clostridia</i>              | <i>Clostridiales</i>               | <i>Lachnospiraceae</i>             | <i>unclassified_Lachnospiraceae</i>   | LFD+CR 62w   | 3.653813651       | 0.0052249 |
| 129    | <i>Firmicutes</i>     | <i>Clostridia</i>              | <i>Clostridiales</i>               | <i>Lachnospiraceae</i>             | <i>unclassified_Lachnospiraceae</i>   | LFD+CR 62w   | 3.559366431       | 0.0224266 |
| 165    | <i>Firmicutes</i>     | <i>Clostridia</i>              | <i>Clostridiales</i>               | <i>Lachnospiraceae</i>             | <i>unclassified_Lachnospiraceae</i>   | LFD+CR 62w   | 3.439447365       | 0.0050259 |
| 205    | <i>Firmicutes</i>     | <i>Clostridia</i>              | <i>Clostridiales</i>               | <i>Lachnospiraceae</i>             | <i>unclassified_Lachnospiraceae</i>   | LFD+CR 62w   | 3.414132006       | 0.0007124 |
| 4      | <i>Firmicutes</i>     | <i>Erysipelotrichi</i>         | <i>Erysipelotrichales</i>          | <i>Erysipelotrichaceae</i>         | <i>Allobaculum</i>                    | LFD+CR 62w   | 4.80509099        | 0.0011298 |
| 80     | <i>Firmicutes</i>     | <i>Erysipelotrichi</i>         | <i>Erysipelotrichales</i>          | <i>Erysipelotrichaceae</i>         | <i>Allobaculum</i>                    | LFD+CR 62w   | 4.406775797       | 0.0006617 |
| 83     | <i>Firmicutes</i>     | <i>Erysipelotrichi</i>         | <i>Erysipelotrichales</i>          | <i>Erysipelotrichaceae</i>         | <i>Allobaculum</i>                    | LFD+CR 62w   | 3.566830839       | 0.0013053 |
| 110    | <i>Firmicutes</i>     | <i>Erysipelotrichi</i>         | <i>Erysipelotrichales</i>          | <i>Erysipelotrichaceae</i>         | <i>Allobaculum</i>                    | LFD+CR 62w   | 3.567277401       | 0.00441   |
| 118    | <i>Firmicutes</i>     | <i>Erysipelotrichi</i>         | <i>Erysipelotrichales</i>          | <i>Erysipelotrichaceae</i>         | <i>Allobaculum</i>                    | LFD+CR 62w   | 3.591845857       | 0.0109715 |
| 134    | <i>Firmicutes</i>     | <i>Erysipelotrichi</i>         | <i>Erysipelotrichales</i>          | <i>Erysipelotrichaceae</i>         | <i>Allobaculum</i>                    | LFD+CR 62w   | 3.698486383       | 0.0057186 |
| 252    | <i>Firmicutes</i>     | <i>Erysipelotrichi</i>         | <i>Erysipelotrichales</i>          | <i>Erysipelotrichaceae</i>         | <i>Allobaculum</i>                    | LFD+CR 62w   | 3.237366726       | 0.0119192 |
| 261    | <i>Firmicutes</i>     | <i>Erysipelotrichi</i>         | <i>Erysipelotrichales</i>          | <i>Erysipelotrichaceae</i>         | <i>Allobaculum</i>                    | LFD+CR 62w   | 3.372001984       | 0.0287007 |
| 315    | <i>Firmicutes</i>     | <i>Erysipelotrichi</i>         | <i>Erysipelotrichales</i>          | <i>Erysipelotrichaceae</i>         | <i>Allobaculum</i>                    | LFD+CR 62w   | 3.438837753       | 0.0261741 |
| 592    | <i>Firmicutes</i>     | <i>Erysipelotrichi</i>         | <i>Erysipelotrichales</i>          | <i>Erysipelotrichaceae</i>         | <i>Allobaculum</i>                    | LFD+CR 62w   | 3.328625929       | 0.0023919 |
| 602    | <i>Firmicutes</i>     | <i>Erysipelotrichi</i>         | <i>Erysipelotrichales</i>          | <i>Erysipelotrichaceae</i>         | <i>Allobaculum</i>                    | LFD+CR 62w   | 3.046755607       | 0.0206314 |
| 646    | <i>Firmicutes</i>     | <i>Erysipelotrichi</i>         | <i>Erysipelotrichales</i>          | <i>Erysipelotrichaceae</i>         | <i>Allobaculum</i>                    | LFD+CR 62w   | 3.272986421       | 0.0177051 |
| 1821   | <i>Firmicutes</i>     | <i>Erysipelotrichi</i>         | <i>Erysipelotrichales</i>          | <i>Erysipelotrichaceae</i>         | <i>Allobaculum</i>                    | LFD+CR 62w   | 3.552567805       | 0.0044794 |
| 2231   | <i>Firmicutes</i>     | <i>Erysipelotrichi</i>         | <i>Erysipelotrichales</i>          | <i>Erysipelotrichaceae</i>         | <i>Allobaculum</i>                    | LFD+CR 62w   | 3.419542616       | 0.0231258 |
| 2563   | <i>Firmicutes</i>     | <i>Erysipelotrichi</i>         | <i>Erysipelotrichales</i>          | <i>Erysipelotrichaceae</i>         | <i>Allobaculum</i>                    | LFD+CR 62w   | 3.744610901       | 0.0023659 |
| 3793   | <i>Firmicutes</i>     | <i>Erysipelotrichi</i>         | <i>Erysipelotrichales</i>          | <i>Erysipelotrichaceae</i>         | <i>Allobaculum</i>                    | LFD+CR 62w   | 3.428173621       | 0.0261229 |

**Supplementary Table S6 The phylotypes of midlife (62 weeks) gut microbiota of normal chow that significantly correlated with lifespan.**

| OTU id | Phylum         | Class               | Order              | Family                | Genus           | p value with lifespan | r with lifespan | r with food intake | r with body weight | r with fat content |
|--------|----------------|---------------------|--------------------|-----------------------|-----------------|-----------------------|-----------------|--------------------|--------------------|--------------------|
| 273    | Actinobacteria | Actinobacteria      | Coriobacteriales   | Coriobacteriaceae     | Eggerthella     | 0.023616998           | -0.242865374    | 0.148461967        | 0.076722918        | 0.314613891        |
| 173    | Bacteroidetes  | Bacteroidia         | Bacteroidales      | Bacteroidaceae        | Bacteroides     | 0.018755583           | -0.221211399    | 0.129946179        | 0.003496504        | -0.058823529       |
| 142    | Bacteroidetes  | Bacteroidia         | Bacteroidales      | Porphyromonadaceae    | Parabacteroides | 0.013116368           | -0.254245454    | 0.137434574        | -0.024308167       | -0.115517213       |
| 963    | Bacteroidetes  | Bacteroidia         | Bacteroidales      | Porphyromonadaceae    | Tannerella      | 0.014079841           | -0.257361405    | 0.049003528        | -0.000914915       | -0.082512295       |
| 97     | Bacteroidetes  | Bacteroidia         | Bacteroidales      | Porphyromonadaceae    |                 | 0.006868157           | -0.255455487    | 0.020747537        | -0.049209653       | -0.102941176       |
| 133    | Bacteroidetes  | Bacteroidia         | Bacteroidales      | Porphyromonadaceae    |                 | 0.038047943           | -0.195378343    | 0.243925427        | 0.043371811        | -0.25              |
| 203    | Bacteroidetes  | Bacteroidia         | Bacteroidales      | Prevotellaceae        |                 | 0.008622378           | -0.267992916    | 0.290822732        | 0.169385338        | 0.188648444        |
| 365    | Bacteroidetes  | Bacteroidia         | Bacteroidales      | Rikenellaceae         | Alistipes       | 0.000137404           | -0.35841847     | 0.373021973        | 0.2412588          | 0.029411765        |
| 510    | Bacteroidetes  | Bacteroidia         | Bacteroidales      | Rikenellaceae         | Alistipes       | 0.004216812           | -0.302549613    | 0.101408749        | 0.118597314        | 0.061494005        |
| 364    | Bacteroidetes  | Bacteroidia         | Bacteroidales      | Rikenellaceae         | Alistipes       | 0.017907098           | -0.248202636    | 0.161011593        | 0.15187589         | 0.102490008        |
| 197    | Bacteroidetes  | Bacteroidia         | Bacteroidales      | Rikenellaceae         | Alistipes       | 0.010453381           | -0.241658258    | 0.345183386        | 0.310878418        | 0.228783845        |
| 381    | Bacteroidetes  | Bacteroidia         | Bacteroidales      | Rikenellaceae         | Rikenella       | 0.007685566           | -0.274351631    | -0.013955233       | 0.084261758        | 0.152812461        |
| 162    | Bacteroidetes  | Bacteroidia         | Bacteroidales      |                       |                 | 5.75E-06              | -0.447130625    | 0.403000458        | 0.293736408        | 0.300828419        |
| 366    | Bacteroidetes  | Bacteroidia         | Bacteroidales      |                       |                 | 0.000219439           | -0.351086435    | 0.33069749         | 0.230269204        | 0.287824838        |
| 1408   | Bacteroidetes  | Bacteroidia         | Bacteroidales      |                       |                 | 0.017526742           | -0.256045727    | 0.22226312         | 0.086685867        | 0.225188675        |
| 643    | Bacteroidetes  | Bacteroidia         | Bacteroidales      |                       |                 | 0.018253231           | -0.253244236    | 0.249325441        | 0.245720696        | 0.270226409        |
| 371    | Bacteroidetes  | Bacteroidia         | Bacteroidales      |                       |                 | 0.00960476            | -0.244124883    | 0.003063987        | -0.016117745       | -0.081789473       |
| 65     | Firmicutes     | Bacilli             | Lactobacillales    | Streptococcaceae      | Lactococcus     | 0.042369948           | -0.195173649    | 0.363318941        | 0.392815108        | 0.541491154        |
| 137    | Firmicutes     | Clostridia          | Clostridiales      | Lachnospiraceae       |                 | 0.00597929            | -0.271309769    | 0.008275163        | 0.064349471        | -0.171498585       |
| 211    | Firmicutes     | Clostridia          | Clostridiales      | Lachnospiraceae       |                 | 0.02066821            | -0.241508762    | 0.417622975        | 0.375783998        | 0.295358674        |
| 18     | Firmicutes     | Clostridia          | Clostridiales      | Lachnospiraceae       |                 | 0.044897634           | -0.203062113    | 0.129342088        | 0.069226195        | 0.163984012        |
| 190    | Firmicutes     | Clostridia          | Clostridiales      | Lachnospiraceae       |                 | 0.043096949           | -0.195623379    | 0.077819552        | 0.092986969        | -0.085749293       |
| 37     | Firmicutes     | Clostridia          | Clostridiales      | Peptostreptococcaceae |                 | 0.011589197           | -0.259867228    | 0.385164443        | 0.38471025         | 0.260680081        |
| 43     | Firmicutes     | Clostridia          | Clostridiales      | Ruminococcaceae       | Papillibacter   | 0.024355208           | -0.223219672    | 0.119365776        | 0.145093135        | -0.071965465       |
| 104    | Firmicutes     | Clostridia          | Clostridiales      | Ruminococcaceae       |                 | 0.006801408           | -0.259895369    | 0.051097408        | 0.109314702        | 0.060165684        |
| 319    | Firmicutes     | Clostridia          | Clostridiales      | Ruminococcaceae       |                 | 0.021887844           | -0.229084959    | 0.220365286        | 0.155676439        | 0.08795779         |
| 67     | Firmicutes     | Clostridia          | Clostridiales      | Ruminococcaceae       |                 | 0.030615391           | -0.212735899    | -0.00738739        | -0.006758347       | -0.038976951       |
| 108    | Firmicutes     | Clostridia          | Clostridiales      |                       |                 | 0.01491153            | -0.257550146    | 0.221635617        | 0.173113821        | 0.171498585        |
| 506    | Proteobacteria | Alphaproteobacteria |                    |                       |                 | 0.018877857           | -0.260449806    | 0.119012099        | 0.039592041        | 0.169411303        |
| 98     | TM7            |                     |                    |                       |                 | 0.000228534           | -0.349251557    | 0.236997601        | 0.229529447        | 0.275110046        |
| 372    | Bacteroidetes  | Bacteroidia         | Bacteroidales      |                       |                 | 0.019010391           | 0.254002676     | -0.290675363       | -0.198335059       | -0.472961743       |
| 4114   | Firmicutes     | Bacilli             | Lactobacillales    | Lactobacillaceae      | Lactobacillus   | 0.015696867           | 0.269272616     | -0.318943918       | -0.281147548       | -0.214373231       |
| 171    | Firmicutes     | Bacilli             | Lactobacillales    | Lactobacillaceae      | Lactobacillus   | 0.005172567           | 0.28399147      | -0.474949499       | -0.491571858       | -0.360147029       |
| 45     | Firmicutes     | Bacilli             | Lactobacillales    | Lactobacillaceae      | Lactobacillus   | 0.002179804           | 0.304764718     | -0.482743447       | -0.454740099       | -0.488905865       |
| 534    | Firmicutes     | Bacilli             | Lactobacillales    | Lactobacillaceae      | Lactobacillus   | 0.005557949           | 0.308826785     | -0.318943918       | -0.31914046        | -0.415827745       |
| 2386   | Firmicutes     | Bacilli             | Lactobacillales    | Lactobacillaceae      | Lactobacillus   | 0.001021483           | 0.363780435     | -0.346217014       | -0.320978336       | -0.171498585       |
| 94     | Firmicutes     | Bacilli             | Lactobacillales    | Lactobacillaceae      | Lactobacillus   | 0.000265355           | 0.373396789     | -0.627617887       | -0.543161804       | -0.617394907       |
| 2219   | Firmicutes     | Bacilli             | Lactobacillales    | Lactobacillaceae      | Lactobacillus   | 0.000283177           | 0.387121165     | -0.528385757       | -0.439082198       | -0.337783012       |
| 63     | Firmicutes     | Bacilli             | Lactobacillales    | Lactobacillaceae      | Lactobacillus   | 0.000222729           | 0.401053693     | -0.442955514       | -0.423657348       | -0.292619524       |
| 335    | Firmicutes     | Clostridia          | Clostridiales      | Lachnospiraceae       |                 | 0.014076118           | 0.264616296     | -0.164942631       | -0.114510961       | -0.046203083       |
| 167    | Firmicutes     | Clostridia          | Clostridiales      | Lachnospiraceae       |                 | 0.002074515           | 0.298400162     | -0.136561782       | -0.103015281       | -0.126401913       |
| 2105   | Firmicutes     | Clostridia          | Clostridiales      | Lachnospiraceae       |                 | 0.0035163             | 0.320662088     | -0.135093405       | -0.138723562       | -0.128623939       |
| 634    | Firmicutes     | Clostridia          | Clostridiales      | Ruminococcaceae       | Papillibacter   | 0.023938024           | 0.250541389     | -0.267390819       | -0.192304201       | -0.128623939       |
| 497    | Firmicutes     | Erysipelotrichi     | Erysipelotrichales | Erysipelotrichaceae   | Allobaculum     | 0.035325199           | 0.221754441     | -0.156318213       | -0.071036445       | 0.066693894        |
| 3941   | Firmicutes     | Erysipelotrichi     | Erysipelotrichales | Erysipelotrichaceae   | Allobaculum     | 0.019717367           | 0.249007624     | -0.069350631       | 0.005035346        | 0.01278275         |

**Supplementary Table S7 The phylotypes of midlife (62 weeks) gut microbiota of high fat diet that significantly correlated with lifespan.**

| OTU id | Phylum         | Class           | Order              | Family                | Genus           | p value with lifespan | r with lifespan | r with food intake | r with body weight | r with fat content |
|--------|----------------|-----------------|--------------------|-----------------------|-----------------|-----------------------|-----------------|--------------------|--------------------|--------------------|
| 2231   | Firmicutes     | Erysipelotrichi | Erysipelotrichales | Erysipelotrichaceae   | Allobaculum     | 0.036604227           | 0.221066994     | -0.175088658       | -0.136455204       | 0.015401028        |
| 118    | Firmicutes     | Erysipelotrichi | Erysipelotrichales | Erysipelotrichaceae   | Allobaculum     | 0.044435774           | 0.186218929     | -0.113110914       | 0.02045617         | 0.168061391        |
| 80     | Firmicutes     | Erysipelotrichi | Erysipelotrichales | Erysipelotrichaceae   | Allobaculum     | 0.047082932           | 0.177577253     | -0.090436866       | 0.102143637        | 0.367647059        |
| 257    | Firmicutes     | Clostridia      | Clostridiales      | Ruminococcaceae       |                 | 0.000154637           | 0.345652514     | -0.151337013       | -0.234558335       | -0.167919418       |
| 337    | Firmicutes     | Clostridia      | Clostridiales      | Ruminococcaceae       |                 | 0.011481343           | 0.260219537     | -0.381690722       | -0.335184529       | -0.370699745       |
| 1044   | Firmicutes     | Clostridia      | Clostridiales      | Ruminococcaceae       |                 | 0.02052191            | 0.24062536      | -0.053278498       | 0.042853072        | 0                  |
| 372    | Bacteroidetes  | Bacteroidia     | Bacteroidales      |                       |                 | 0.000852359           | 0.323933094     | -0.397300923       | -0.399406007       | -0.390635666       |
| 388    | Bacteroidetes  | Bacteroidia     | Bacteroidales      |                       |                 | 0.004892554           | 0.288366731     | -0.452574816       | -0.435158529       | -0.447396243       |
| 193    | Bacteroidetes  | Bacteroidia     | Bacteroidales      |                       |                 | 0.037545681           | 0.218018561     | -0.2084053         | -0.164406921       | 0.089479249        |
| 97     | Bacteroidetes  | Bacteroidia     | Bacteroidales      | Porphyromonadaceae    |                 | 0.002824444           | 0.266099558     | -0.427171735       | -0.37104497        | -0.405906823       |
| 317    | Bacteroidetes  | Bacteroidia     | Bacteroidales      | Porphyromonadaceae    |                 | 0.006788124           | 0.265071518     | -0.269895824       | -0.191049904       | -0.257247878       |
| 658    | Bacteroidetes  | Bacteroidia     | Bacteroidales      | Porphyromonadaceae    |                 | 0.033673716           | 0.223613261     | -0.22051572        | -0.043123368       | 0.022518867        |
| 105    | Bacteroidetes  | Bacteroidia     | Bacteroidales      | Porphyromonadaceae    |                 | 0.03637556            | 0.202622702     | -0.186549078       | -0.096405466       | -0.085749293       |
| 963    | Bacteroidetes  | Bacteroidia     | Bacteroidales      | Porphyromonadaceae    | Tannerella      | 0.00427132            | 0.294038683     | -0.331600076       | -0.273541397       | 0.128623939        |
| 119    | Bacteroidetes  | Bacteroidia     | Bacteroidales      | Porphyromonadaceae    | Tannerella      | 0.001490164           | 0.290301004     | -0.387447872       | -0.274560532       | -0.53474079        |
| 155    | Bacteroidetes  | Bacteroidia     | Bacteroidales      | Porphyromonadaceae    | Tannerella      | 0.004229091           | 0.258663404     | -0.391239973       | -0.323662119       | -0.450187567       |
| 410    | Bacteroidetes  | Bacteroidia     | Bacteroidales      | Porphyromonadaceae    | Tannerella      | 0.040046777           | 0.217188626     | -0.279866122       | -0.24773906        | -0.231015414       |
| 267    | Bacteroidetes  | Bacteroidia     | Bacteroidales      | Porphyromonadaceae    | Tannerella      | 0.018180463           | 0.216647519     | -0.350341927       | -0.279290466       | -0.412514324       |
| 96     | Actinobacteria | Actinobacteria  |                    |                       |                 | 0.026704923           | 0.233231036     | -0.271798446       | -0.117049142       | -0.089479249       |
| 1273   | Actinobacteria | Actinobacteria  |                    |                       |                 | 0.046393987           | 0.210724679     | -0.19576842        | -0.104659817       | 0.046203083        |
| 111    | Firmicutes     | Clostridia      | Clostridiales      | Ruminococcaceae       |                 | 0.015954199           | -0.219810576    | 0.26816439         | 0.087304962        | -0.226066317       |
| 249    | Firmicutes     | Clostridia      | Clostridiales      | Peptostreptococcaceae |                 | 0.021238538           | -0.231320075    | 0.112817637        | 0.185743468        | -0.225478017       |
| 272    | Firmicutes     | Clostridia      | Clostridiales      | Peptostreptococcaceae |                 | 0.008962554           | -0.264517691    | 0.273242981        | 0.341759846        | 0.143486011        |
| 37     | Firmicutes     | Clostridia      | Clostridiales      | Peptostreptococcaceae |                 | 0.001603442           | -0.283937355    | 0.191239092        | 0.354071596        | 0.199263349        |
| 156    | Firmicutes     | Clostridia      | Clostridiales      | Lachnospiraceae       |                 | 0.033191299           | -0.203016349    | 0.140209398        | -0.024761187       | 0.368547701        |
| 649    | Firmicutes     | Clostridia      | Clostridiales      | Lachnospiraceae       |                 | 0.044891199           | -0.206672557    | 0.100181292        | -0.009011212       | -0.01278275        |
| 152    | Firmicutes     | Clostridia      | Clostridiales      | Lachnospiraceae       |                 | 0.035544509           | -0.207677906    | 0.209814595        | 0.035026969        | 0.128623939        |
| 421    | Firmicutes     | Clostridia      | Clostridiales      | Lachnospiraceae       |                 | 0.047012555           | -0.209186599    | -0.005128273       | -0.013553059       | -0.169411303       |
| 323    | Firmicutes     | Clostridia      | Clostridiales      | Lachnospiraceae       |                 | 0.027521756           | -0.224148632    | 0.213586944        | 0.116144079        | 0.34299717         |
| 2031   | Firmicutes     | Clostridia      | Clostridiales      | Lachnospiraceae       |                 | 0.031318753           | -0.224669615    | 0.127781966        | 0.00231559         | 0.085749293        |
| 115    | Firmicutes     | Clostridia      | Clostridiales      | Lachnospiraceae       |                 | 0.005129296           | -0.263709724    | 0.177685579        | 0.148759802        | -0.026966905       |
| 65     | Firmicutes     | Bacilli         | Lactobacillales    | Streptococcaceae      | Lactococcus     | 0.000869514           | -0.295898457    | 0.436823581        | 0.402688486        | 0.058823529        |
| 366    | Bacteroidetes  | Bacteroidia     | Bacteroidales      |                       |                 | 0.006824323           | -0.253917297    | 0.080770971        | 0.06114136         | 0.055973139        |
| 966    | Bacteroidetes  | Bacteroidia     | Bacteroidales      | Porphyromonadaceae    |                 | 0.02517116            | -0.23563548     | 0.097437179        | 0.077622063        | 0.063913749        |
| 142    | Bacteroidetes  | Bacteroidia     | Bacteroidales      | Porphyromonadaceae    | Parabacteroides | 0.033472705           | -0.204260355    | 0.115939876        | 0.127235268        | -0.450956034       |
| 201    | Bacteroidetes  | Bacteroidia     | Bacteroidales      | Bacteroidaceae        | Bacteroides     | 0.028357514           | -0.211398642    | 0.157878286        | 0.064501499        | 0.152812461        |
| 1      | Bacteroidetes  | Bacteroidia     | Bacteroidales      | Bacteroidaceae        | Bacteroides     | 0.03027774            | -0.2270556      | 0.087939809        | 0.038194983        | -0.063913749       |
| 11     | Bacteroidetes  | Bacteroidia     | Bacteroidales      | Bacteroidaceae        | Bacteroides     | 0.003095035           | -0.304372311    | 0.135244744        | -0.113654524       | -0.300122524       |



## Supplementary Methods

As a supervised method, Partial Least Square Discriminate Analysis (PLS-DA) was used to establish classification models of phenotypes based on OTUs data<sup>61</sup>. The correct prediction rate of PLS-DA model was performed with leave-one-out cross valuation<sup>62</sup>. Martens' uncertainty test was used to select significant OTUs which can distinguish different treatment groups at the same age or the same group during aging<sup>63</sup>. One-way ANOVA was further performed to validate these differential variables. All statements of significance are at  $P < 0.05$ .

## Supplementary References

- 61 Perez-Enciso, M. & Tenenhaus, M. Prediction of clinical outcome with microarray data: a partial least squares discriminant analysis (PLS-DA) approach. *Human genetics* **112**, 581-592 (2003).
- 62 Osten., D. W. Selection of optimal regression models via cross-validation. *J. Chemom.* **2**, 39-48 (1988).
- 63 Westad, F. & Martens, H. Variable selection in near infrared spectroscopy based on significance testing in partial least squares regression. *Journal of Near Infrared Spectroscopy* **8(2)**, 117-124. (2000).
